# Supplementary material for: Functional reallocation of sensory processing resources caused by long-term neural adaptation to altered optics
Source: eLife journal article supplement (doi:10.7554/elife.58734), 2021-02-22

# Figure 2- figure supplement 1

A

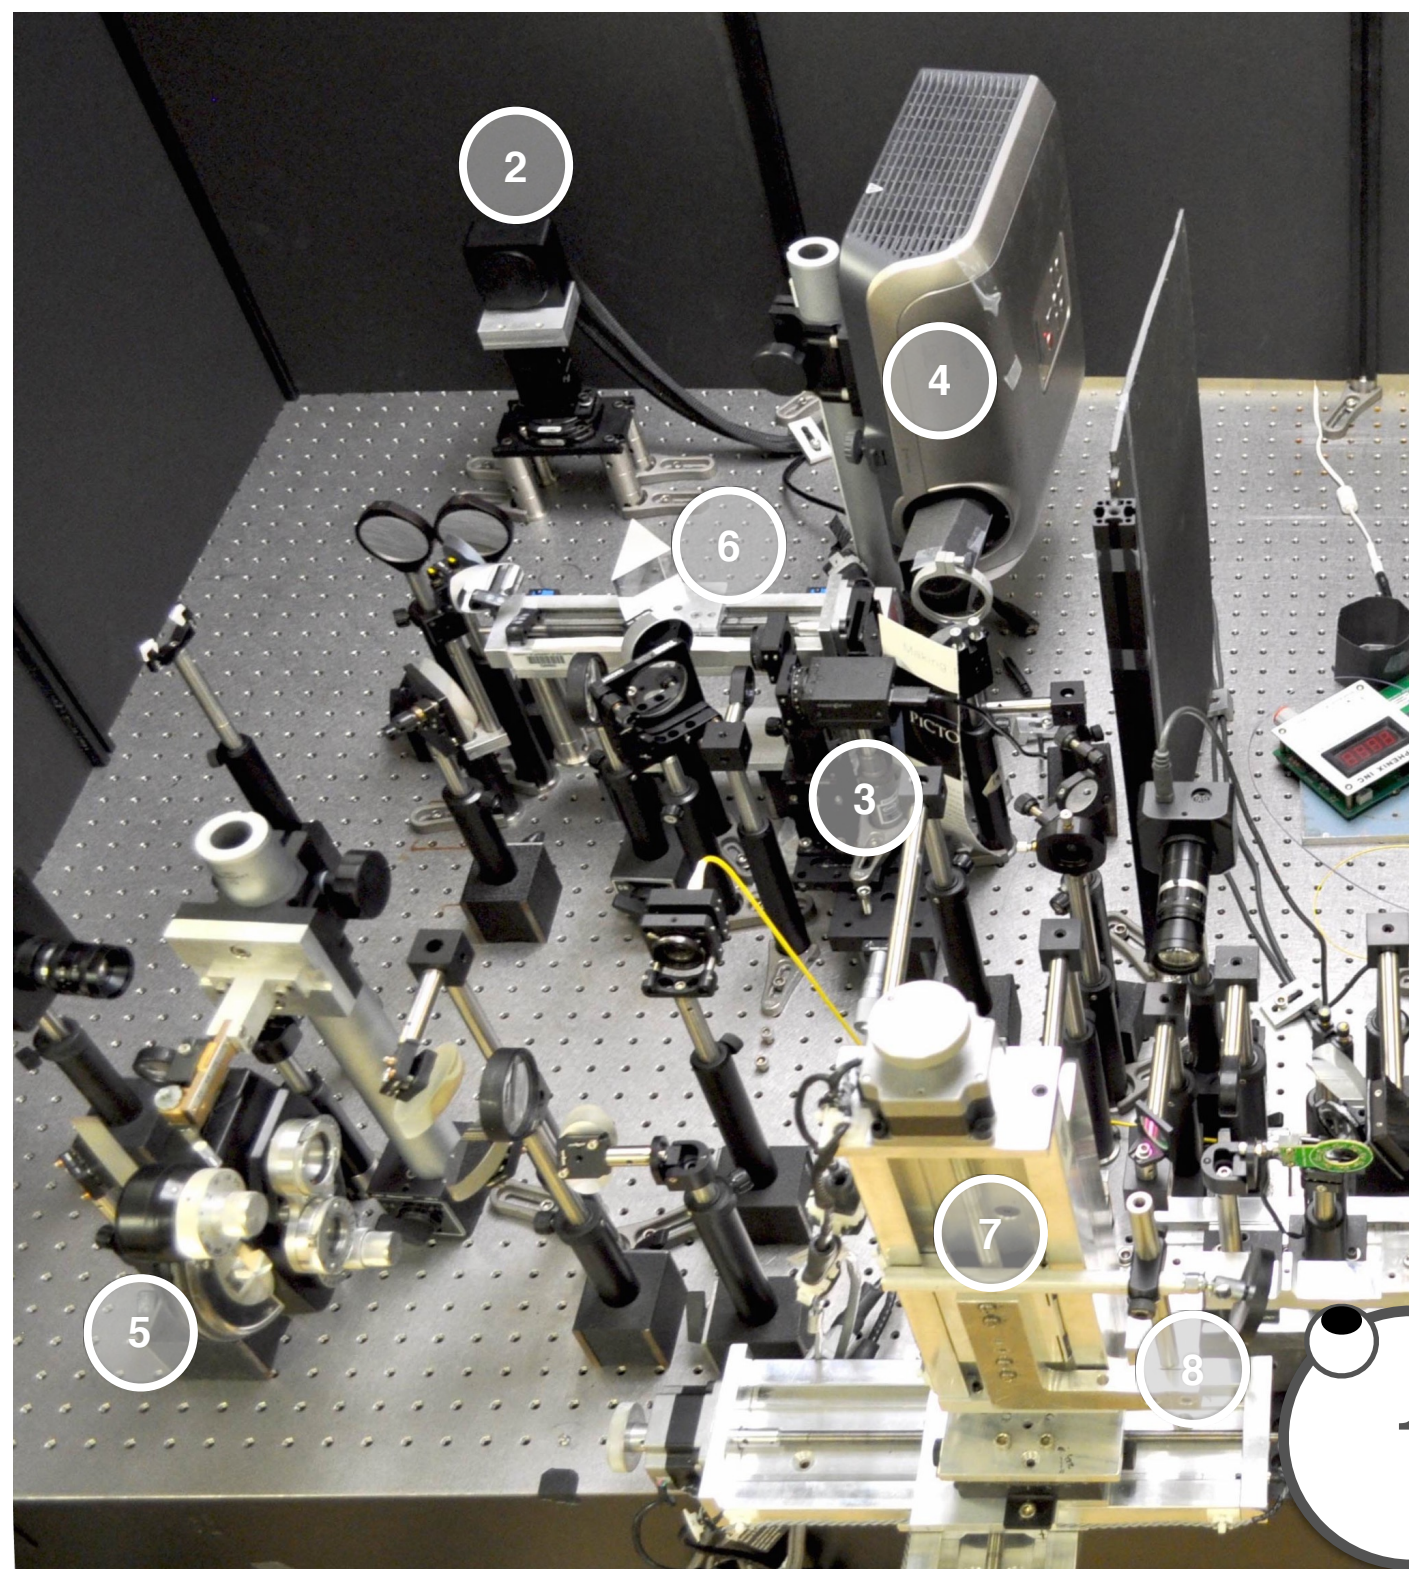

1. subject
2. deformable mirror
3. Shack-Hartmann wavefront sensor
4. projector
5. phoropter
6. motorized Badal prism
7. motorized mounted bite bar
8. adjustable lateral head stabilizer

eye patch  
(monocular testing)

B

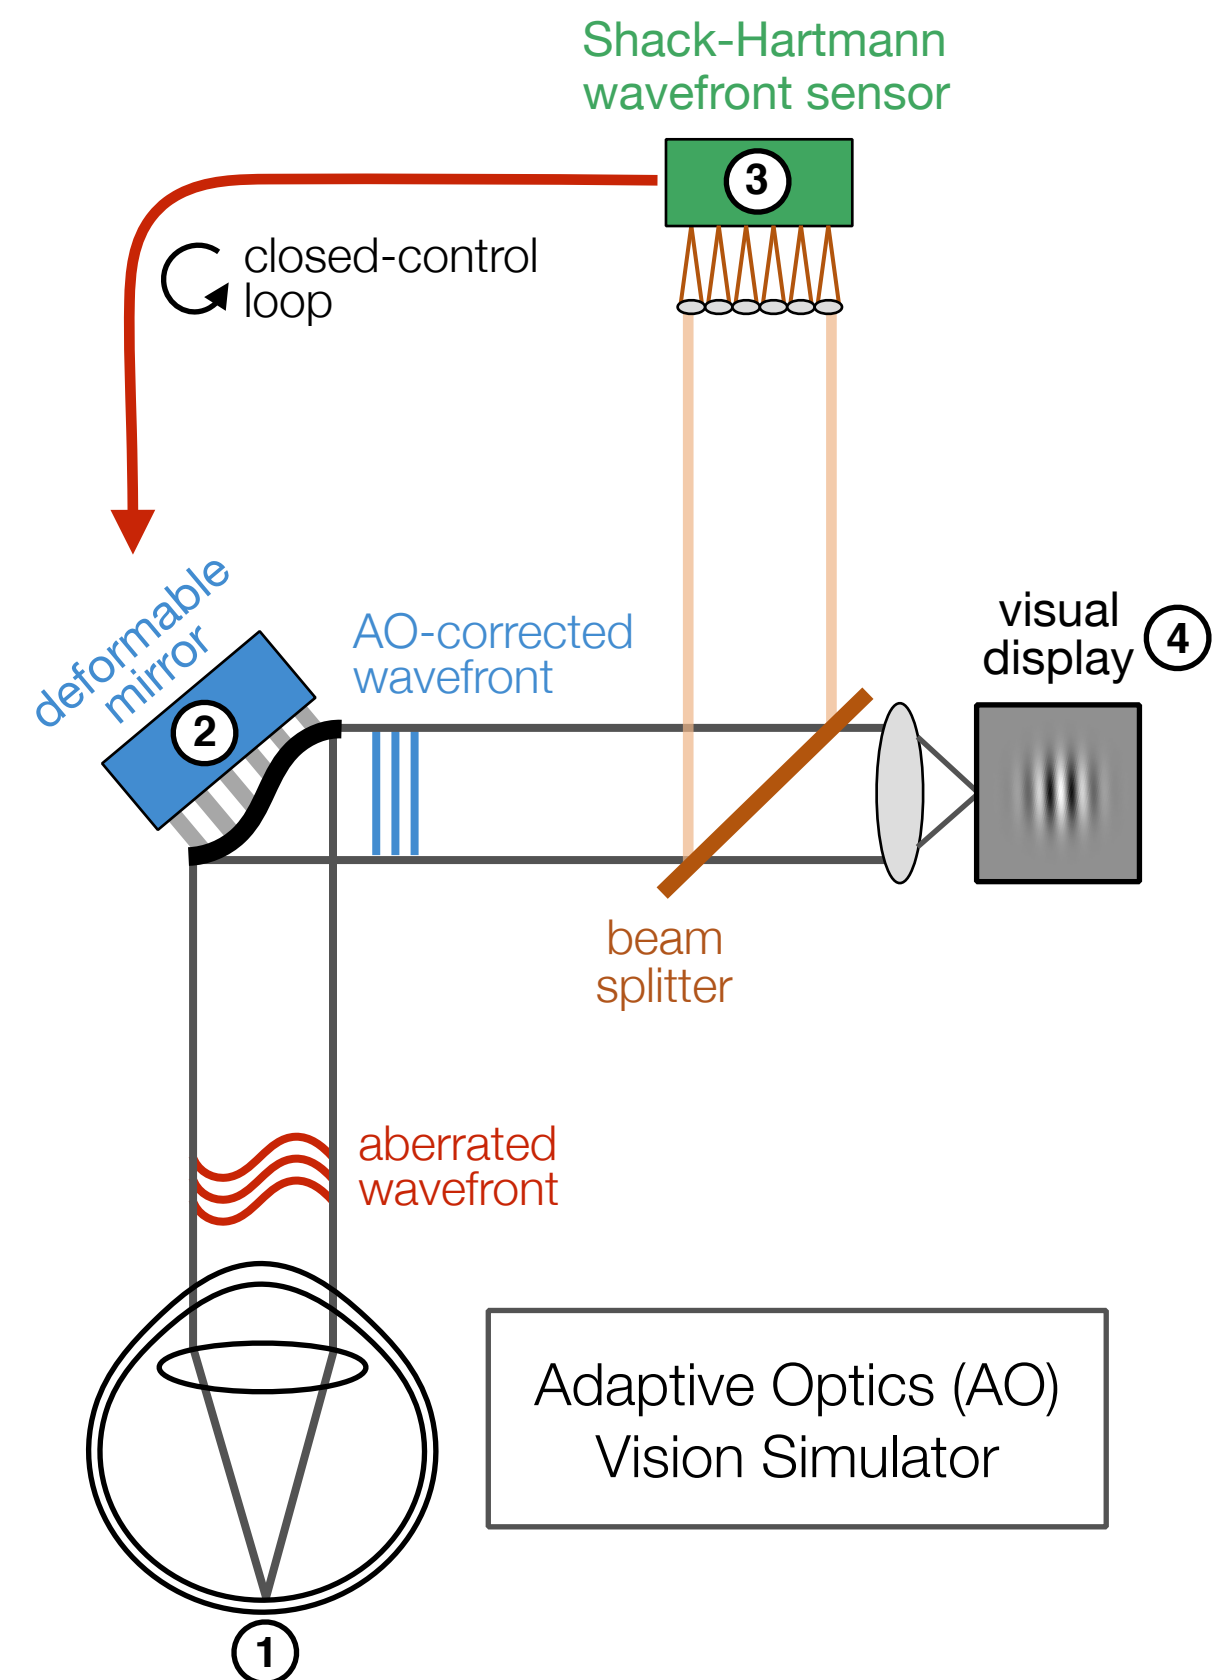

Supplement: supp [file elife_poa_e58734_Figure_2_figure_supplement_1.pdf › elife_poa_e58734_Figure_2_figure_supplement_1.pdf]
