# Supplementary material for: Functional reallocation of sensory processing resources caused by long-term neural adaptation to altered optics
Source: eLife journal article supplement (doi:10.7554/elife.58734), 2021-02-22

# Figure 7- figure supplement 1

**A**

**Full model** ( $A_{add} + A_{mul} + A_{ext} : r^2 = 95.84\%$ )

—CTRL (n=8) —KC mild/moderate (n=3) —KC severe (n=3)

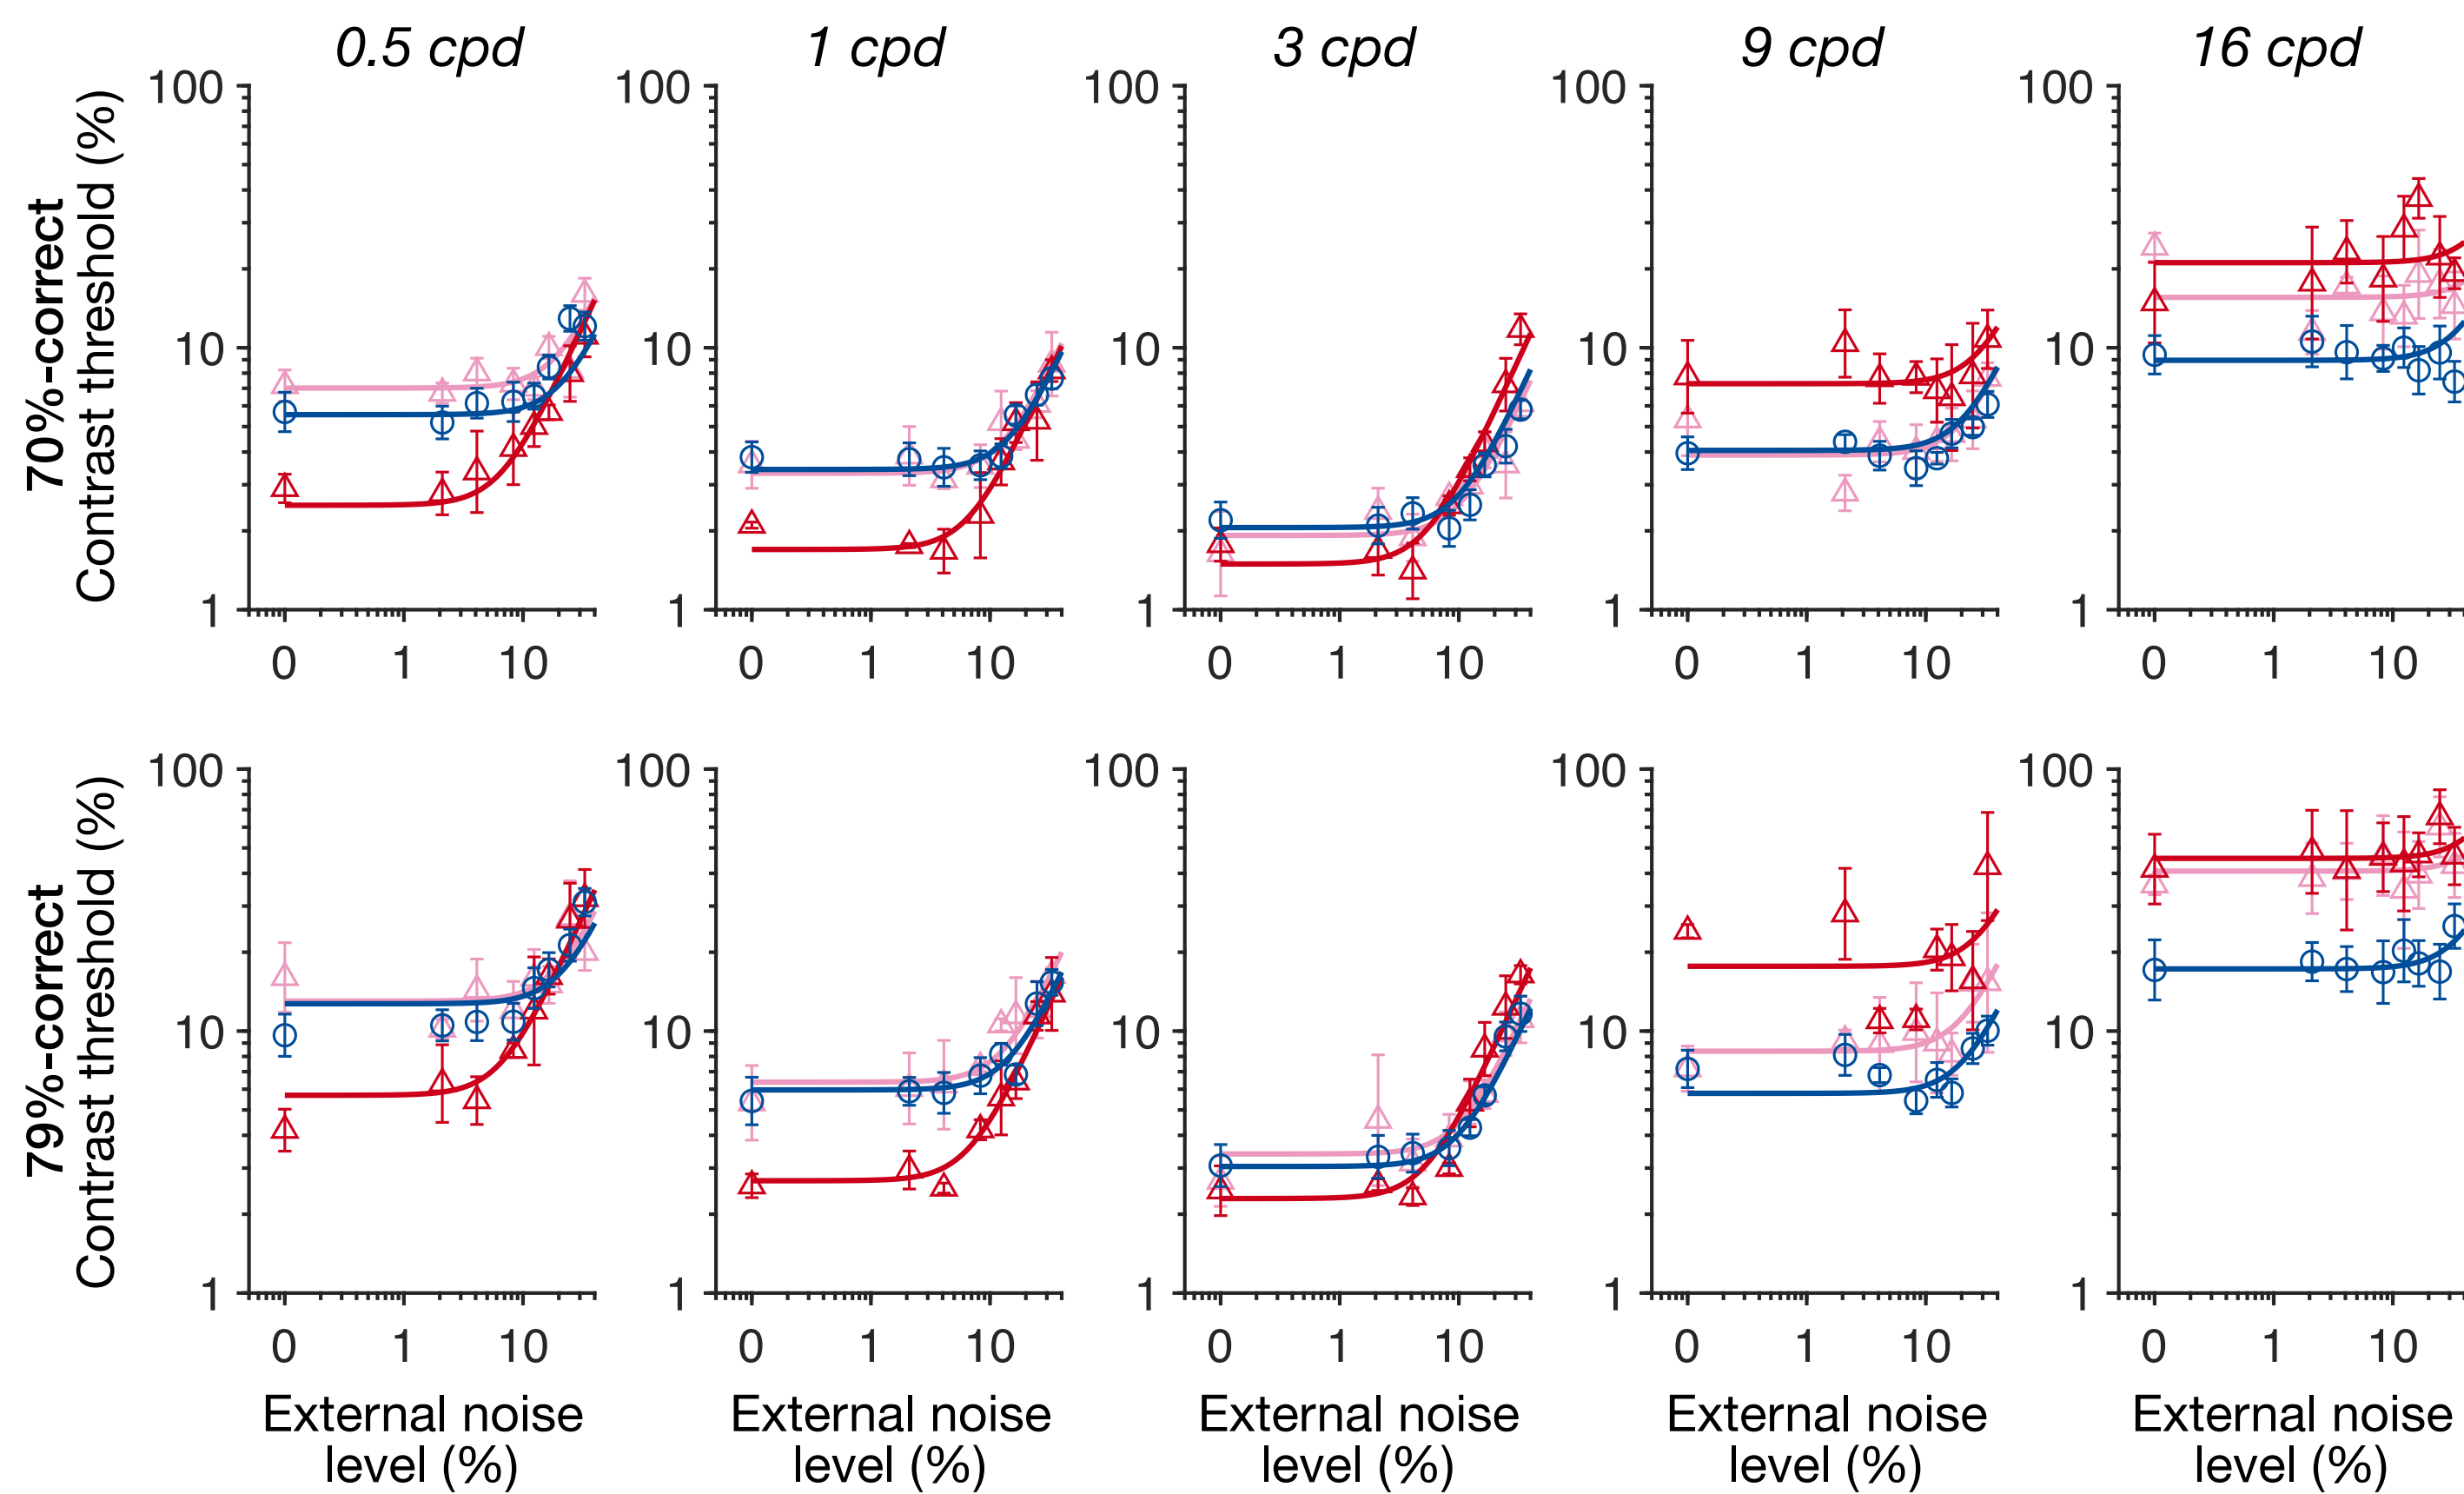

**B**

**Internal additive noise** ( $A_{add} : r^2 = 94.02\%$ )

—CTRL (n=8) —KC mild/moderate (n=3) —KC severe (n=3)

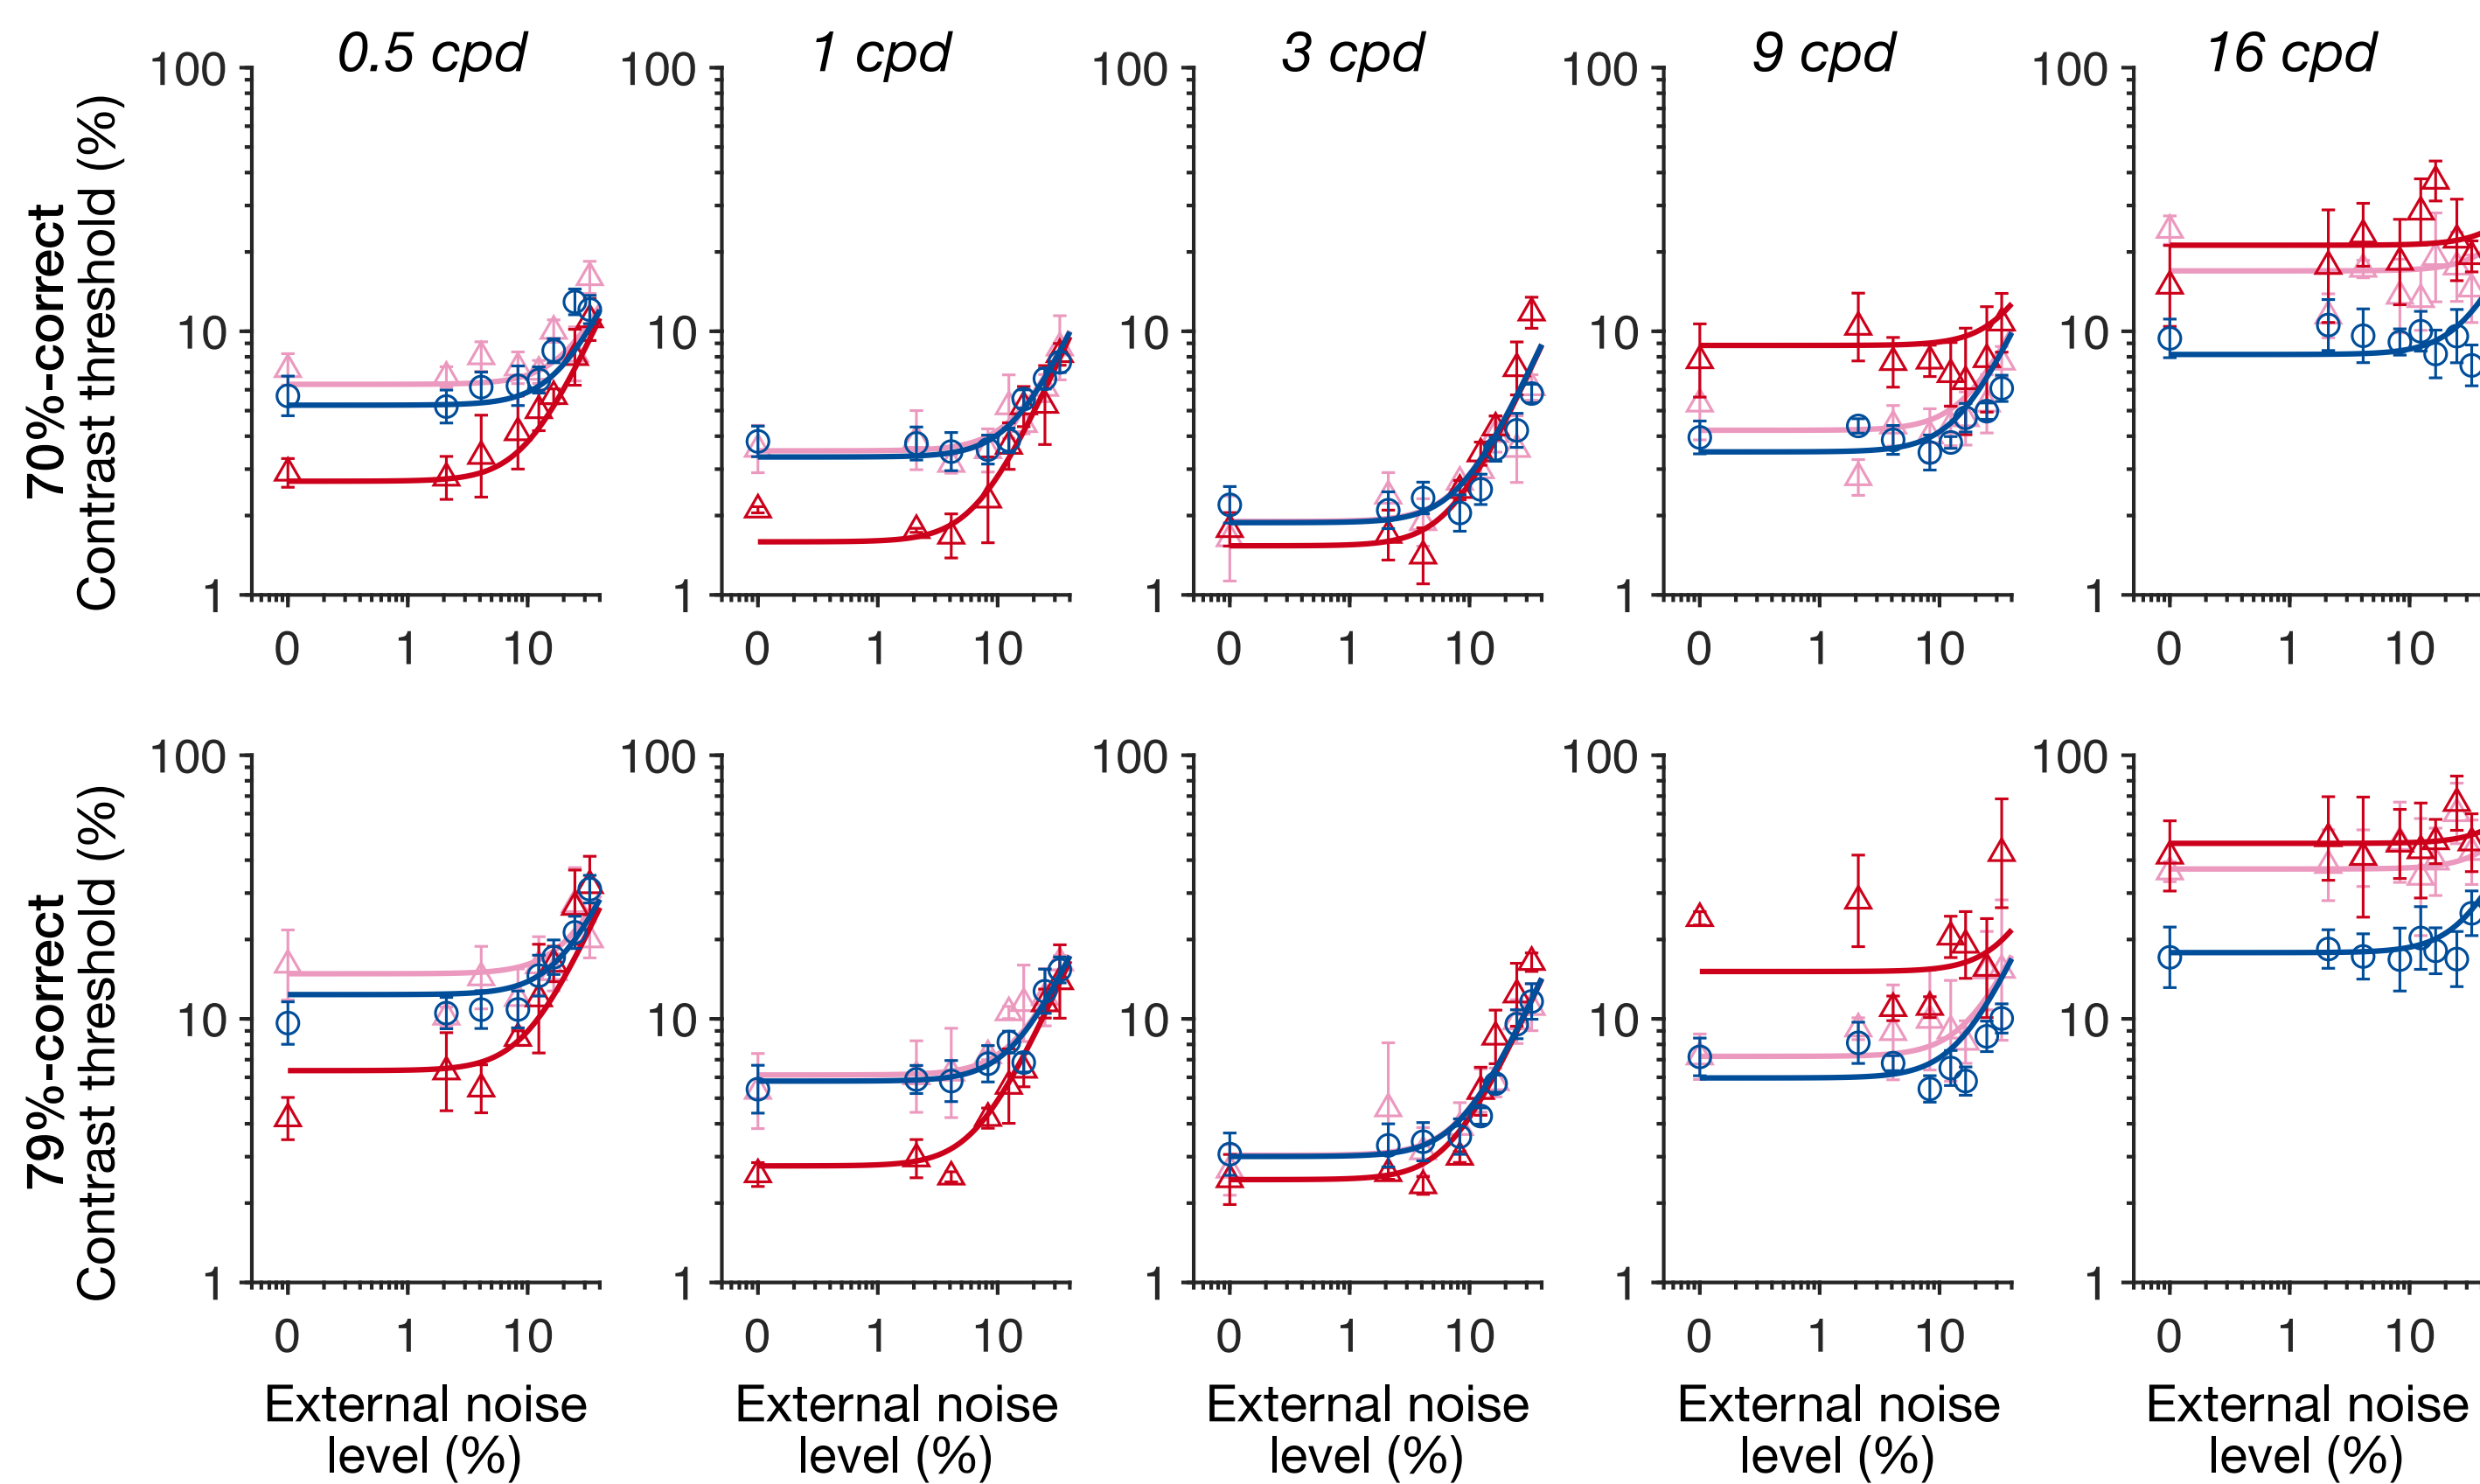

Supplement: supp [file elife_poa_e58734_Figure_7_figure_supplement_1.pdf › elife_poa_e58734_Figure_7_figure_supplement_1.pdf]
