# Supplementary material for: Functional reallocation of sensory processing resources caused by long-term neural adaptation to altered optics
Source: eLife journal article supplement (doi:10.7554/elife.58734), 2021-02-22

# Figure 7- figure supplement 3

## A Multiplicative internal noise + external noise filtering ( $A_{mul} + A_{ext} : r^2 = 93.76\%$ )

—CTRL (n=8) —KC mild/moderate (n=3) —KC severe (n=3)

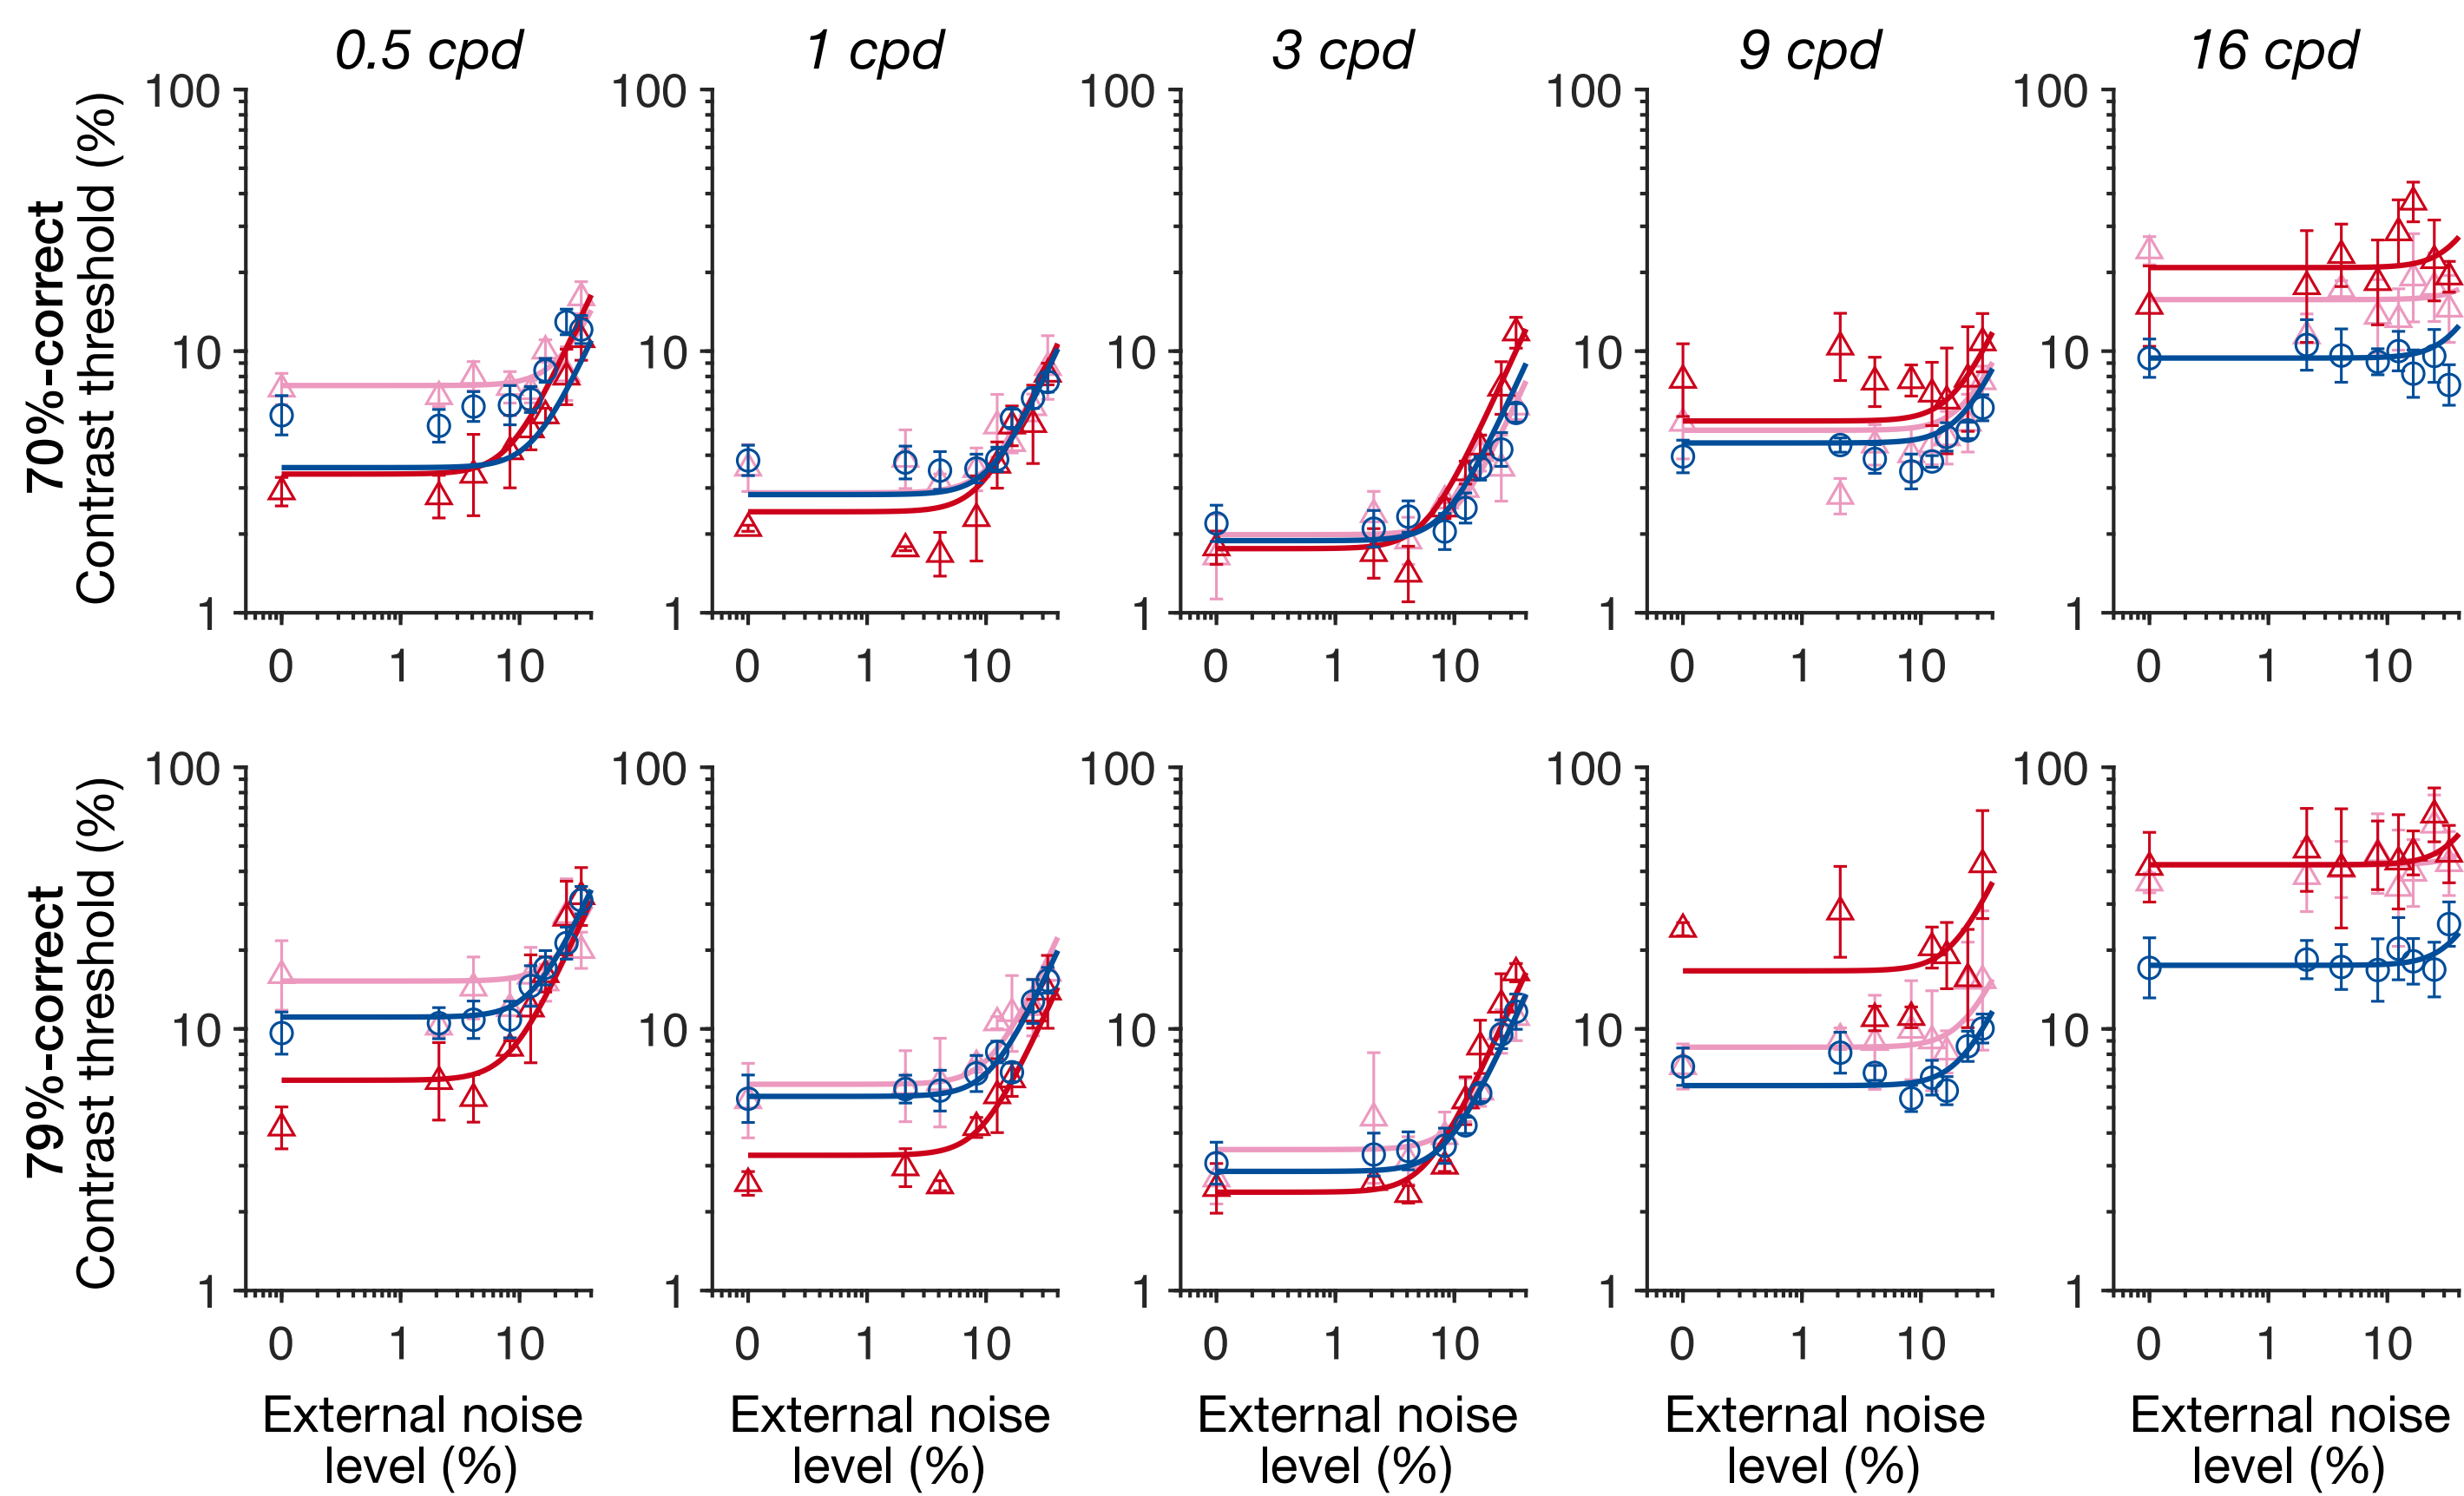

## B Multiplicative internal noise ( $A_{mul} : r^2 = 91.90\%$ )

—CTRL (n=8) —KC mild/moderate (n=3) —KC severe (n=3)

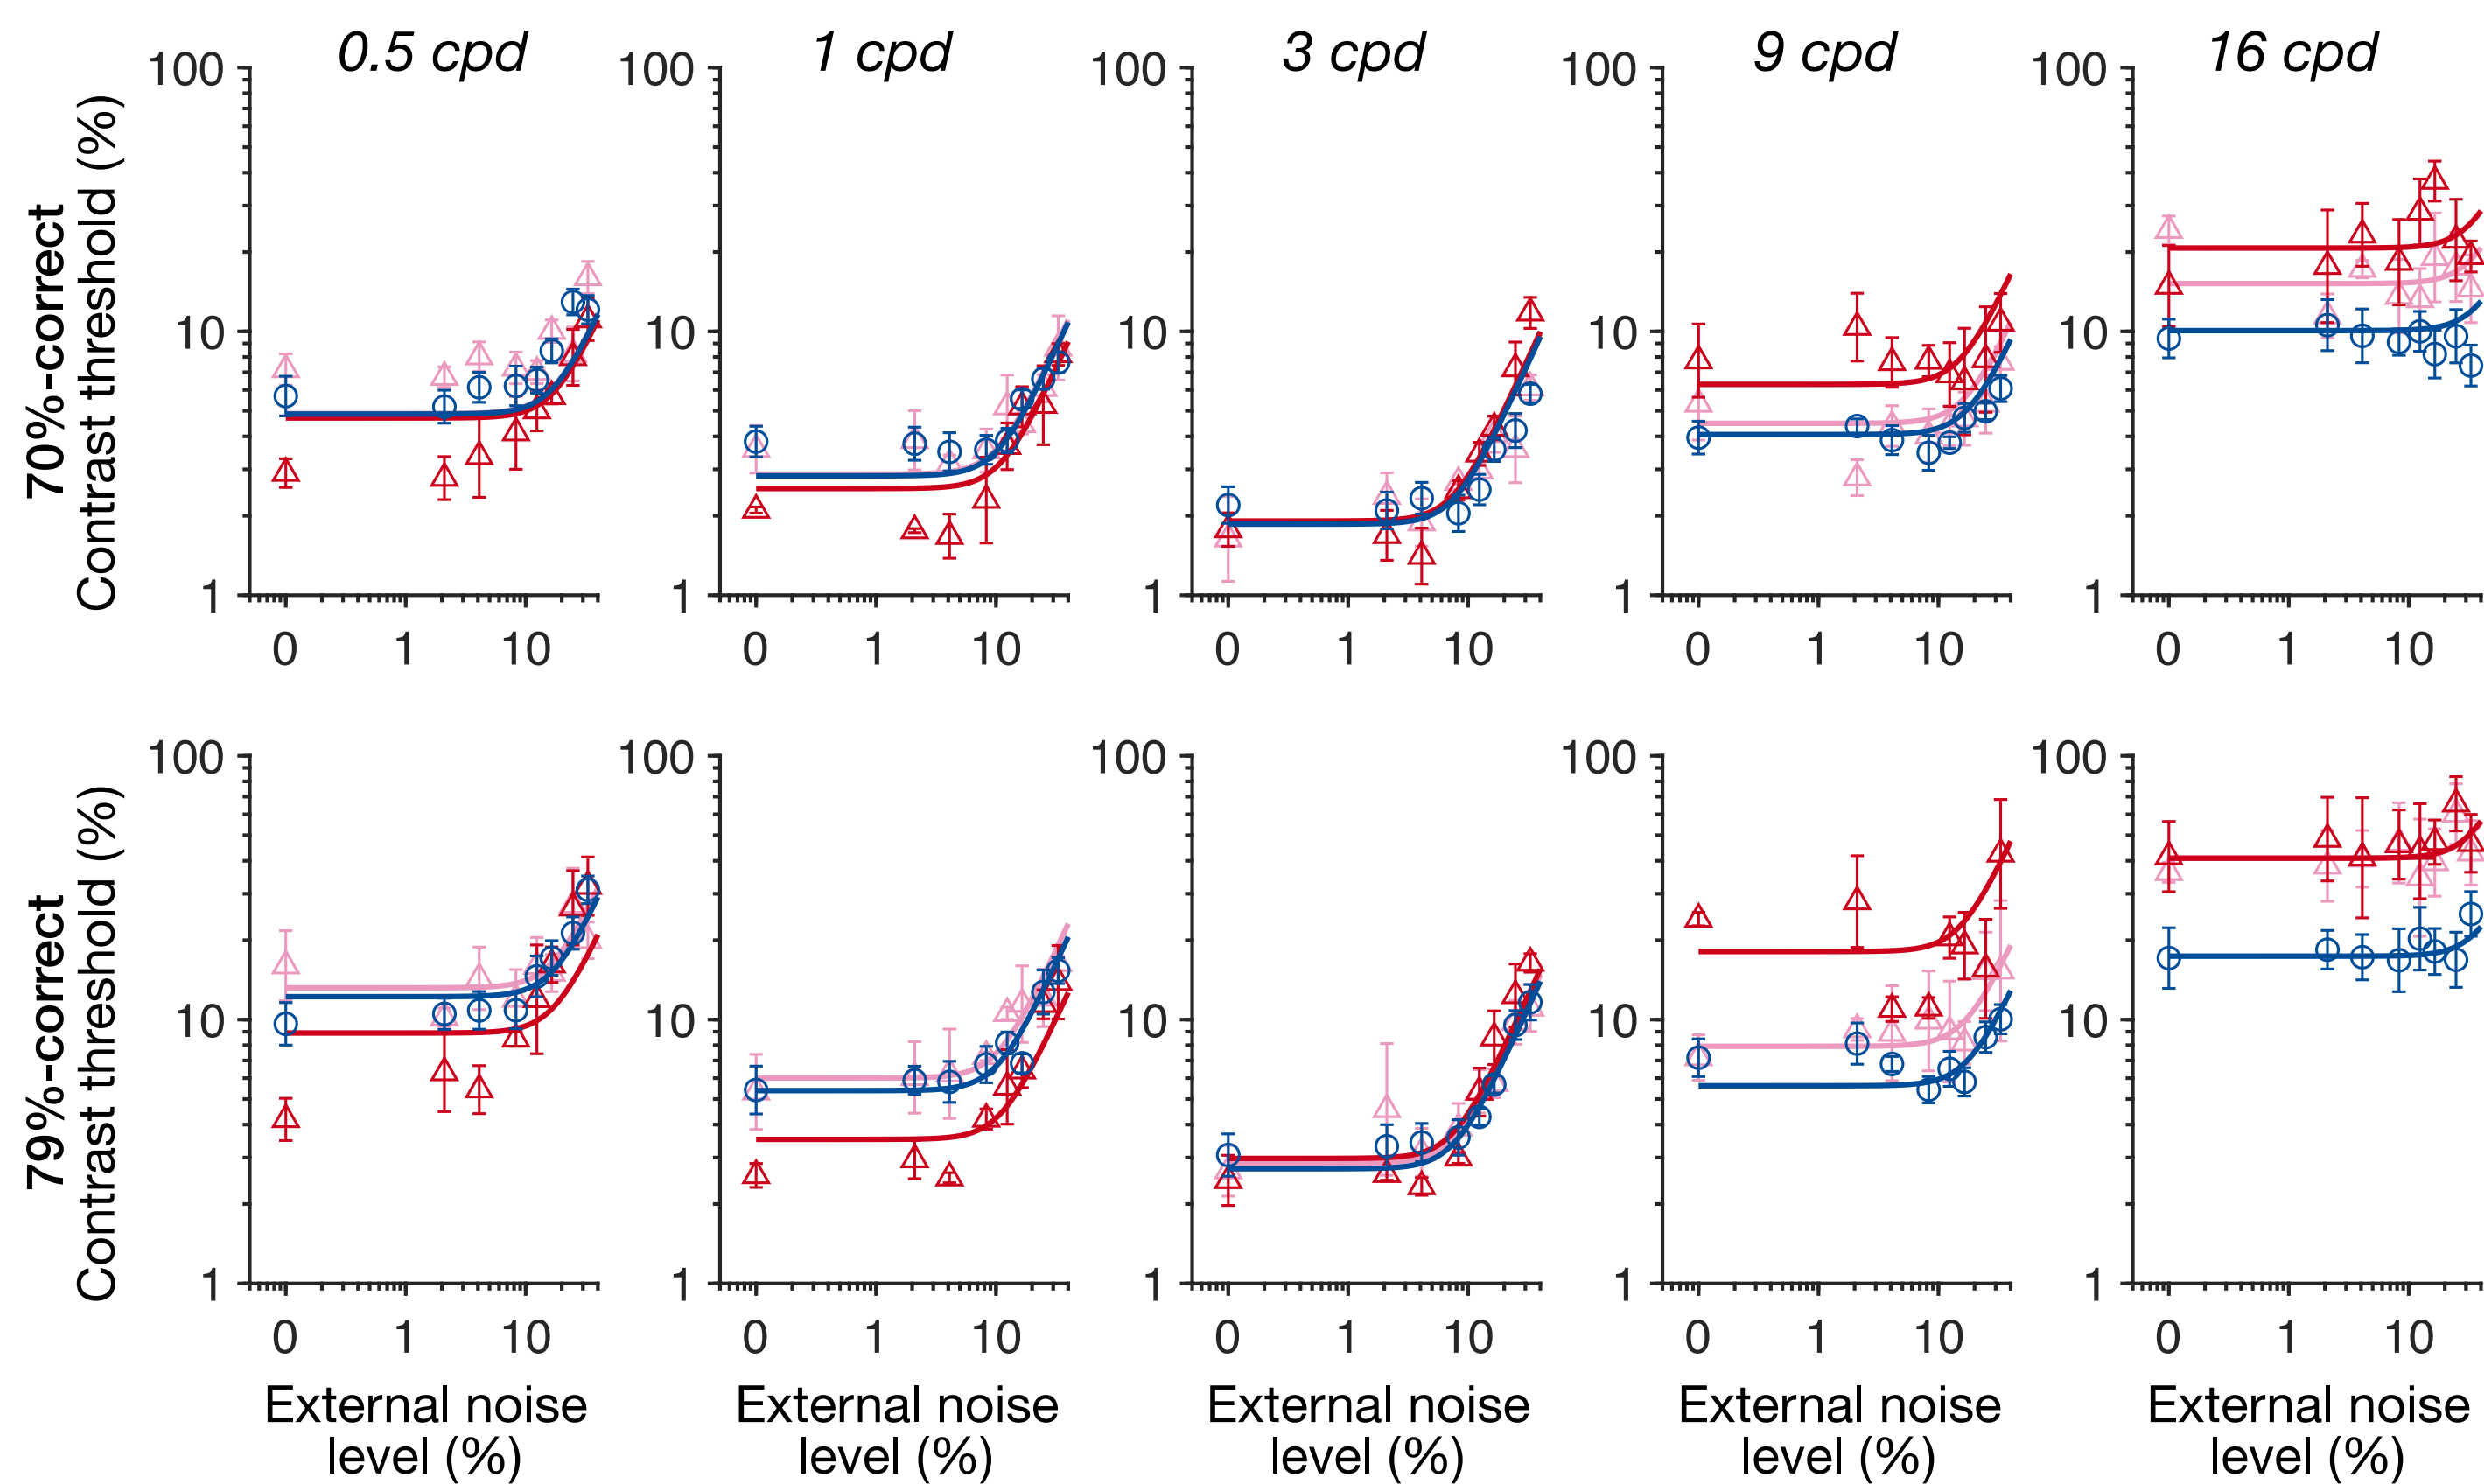

Supplement: supp [file elife_poa_e58734_Figure_7_figure_supplement_3.pdf › elife_poa_e58734_Figure_7_figure_supplement_3.pdf]
