# Supplementary material for: Functional reallocation of sensory processing resources caused by long-term neural adaptation to altered optics
Source: eLife journal article supplement (doi:10.7554/elife.58734), 2021-02-22

# Figure 7- figure supplement 4

**A**

**External noise filtering** ( $A_{ext} : r^2 = 86.03\%$ )

—CTRL (n=8) —KC mild/moderate (n=3) —KC severe (n=3)

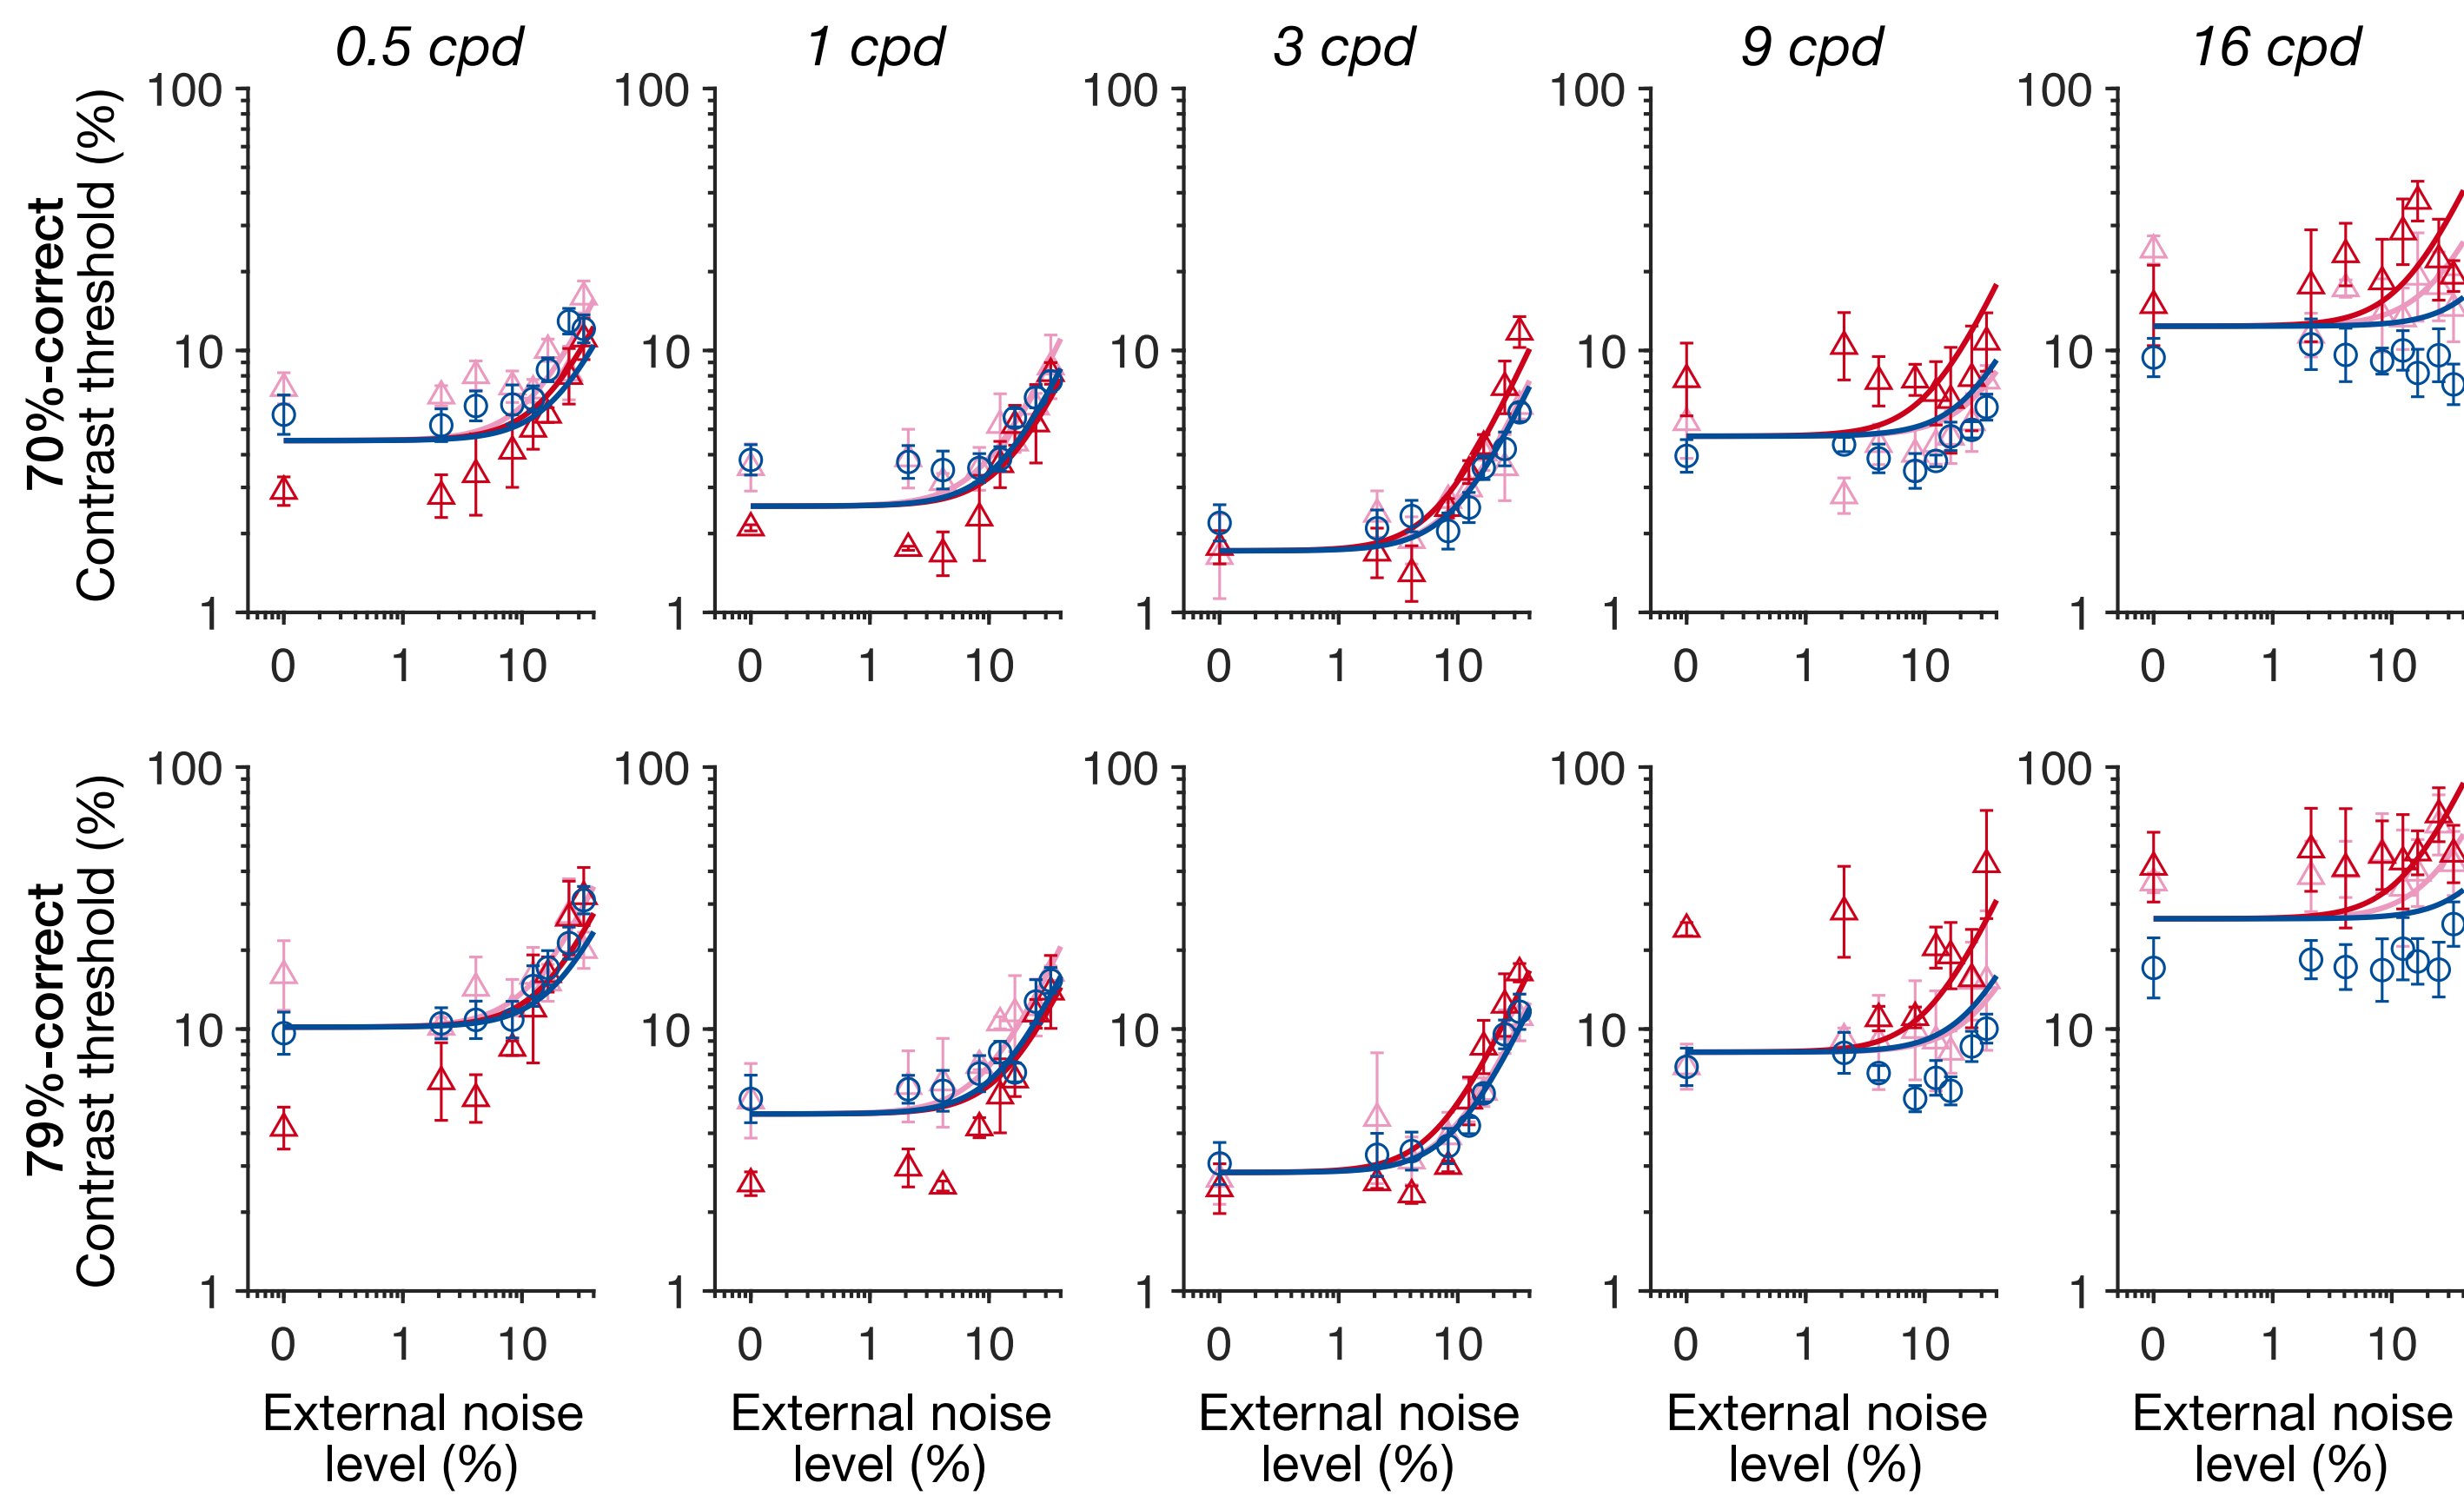

**B**

**Null model** ( $r^2 = 83.31\%$ )

—CTRL (n=8) —KC mild/moderate (n=3) —KC severe (n=3)

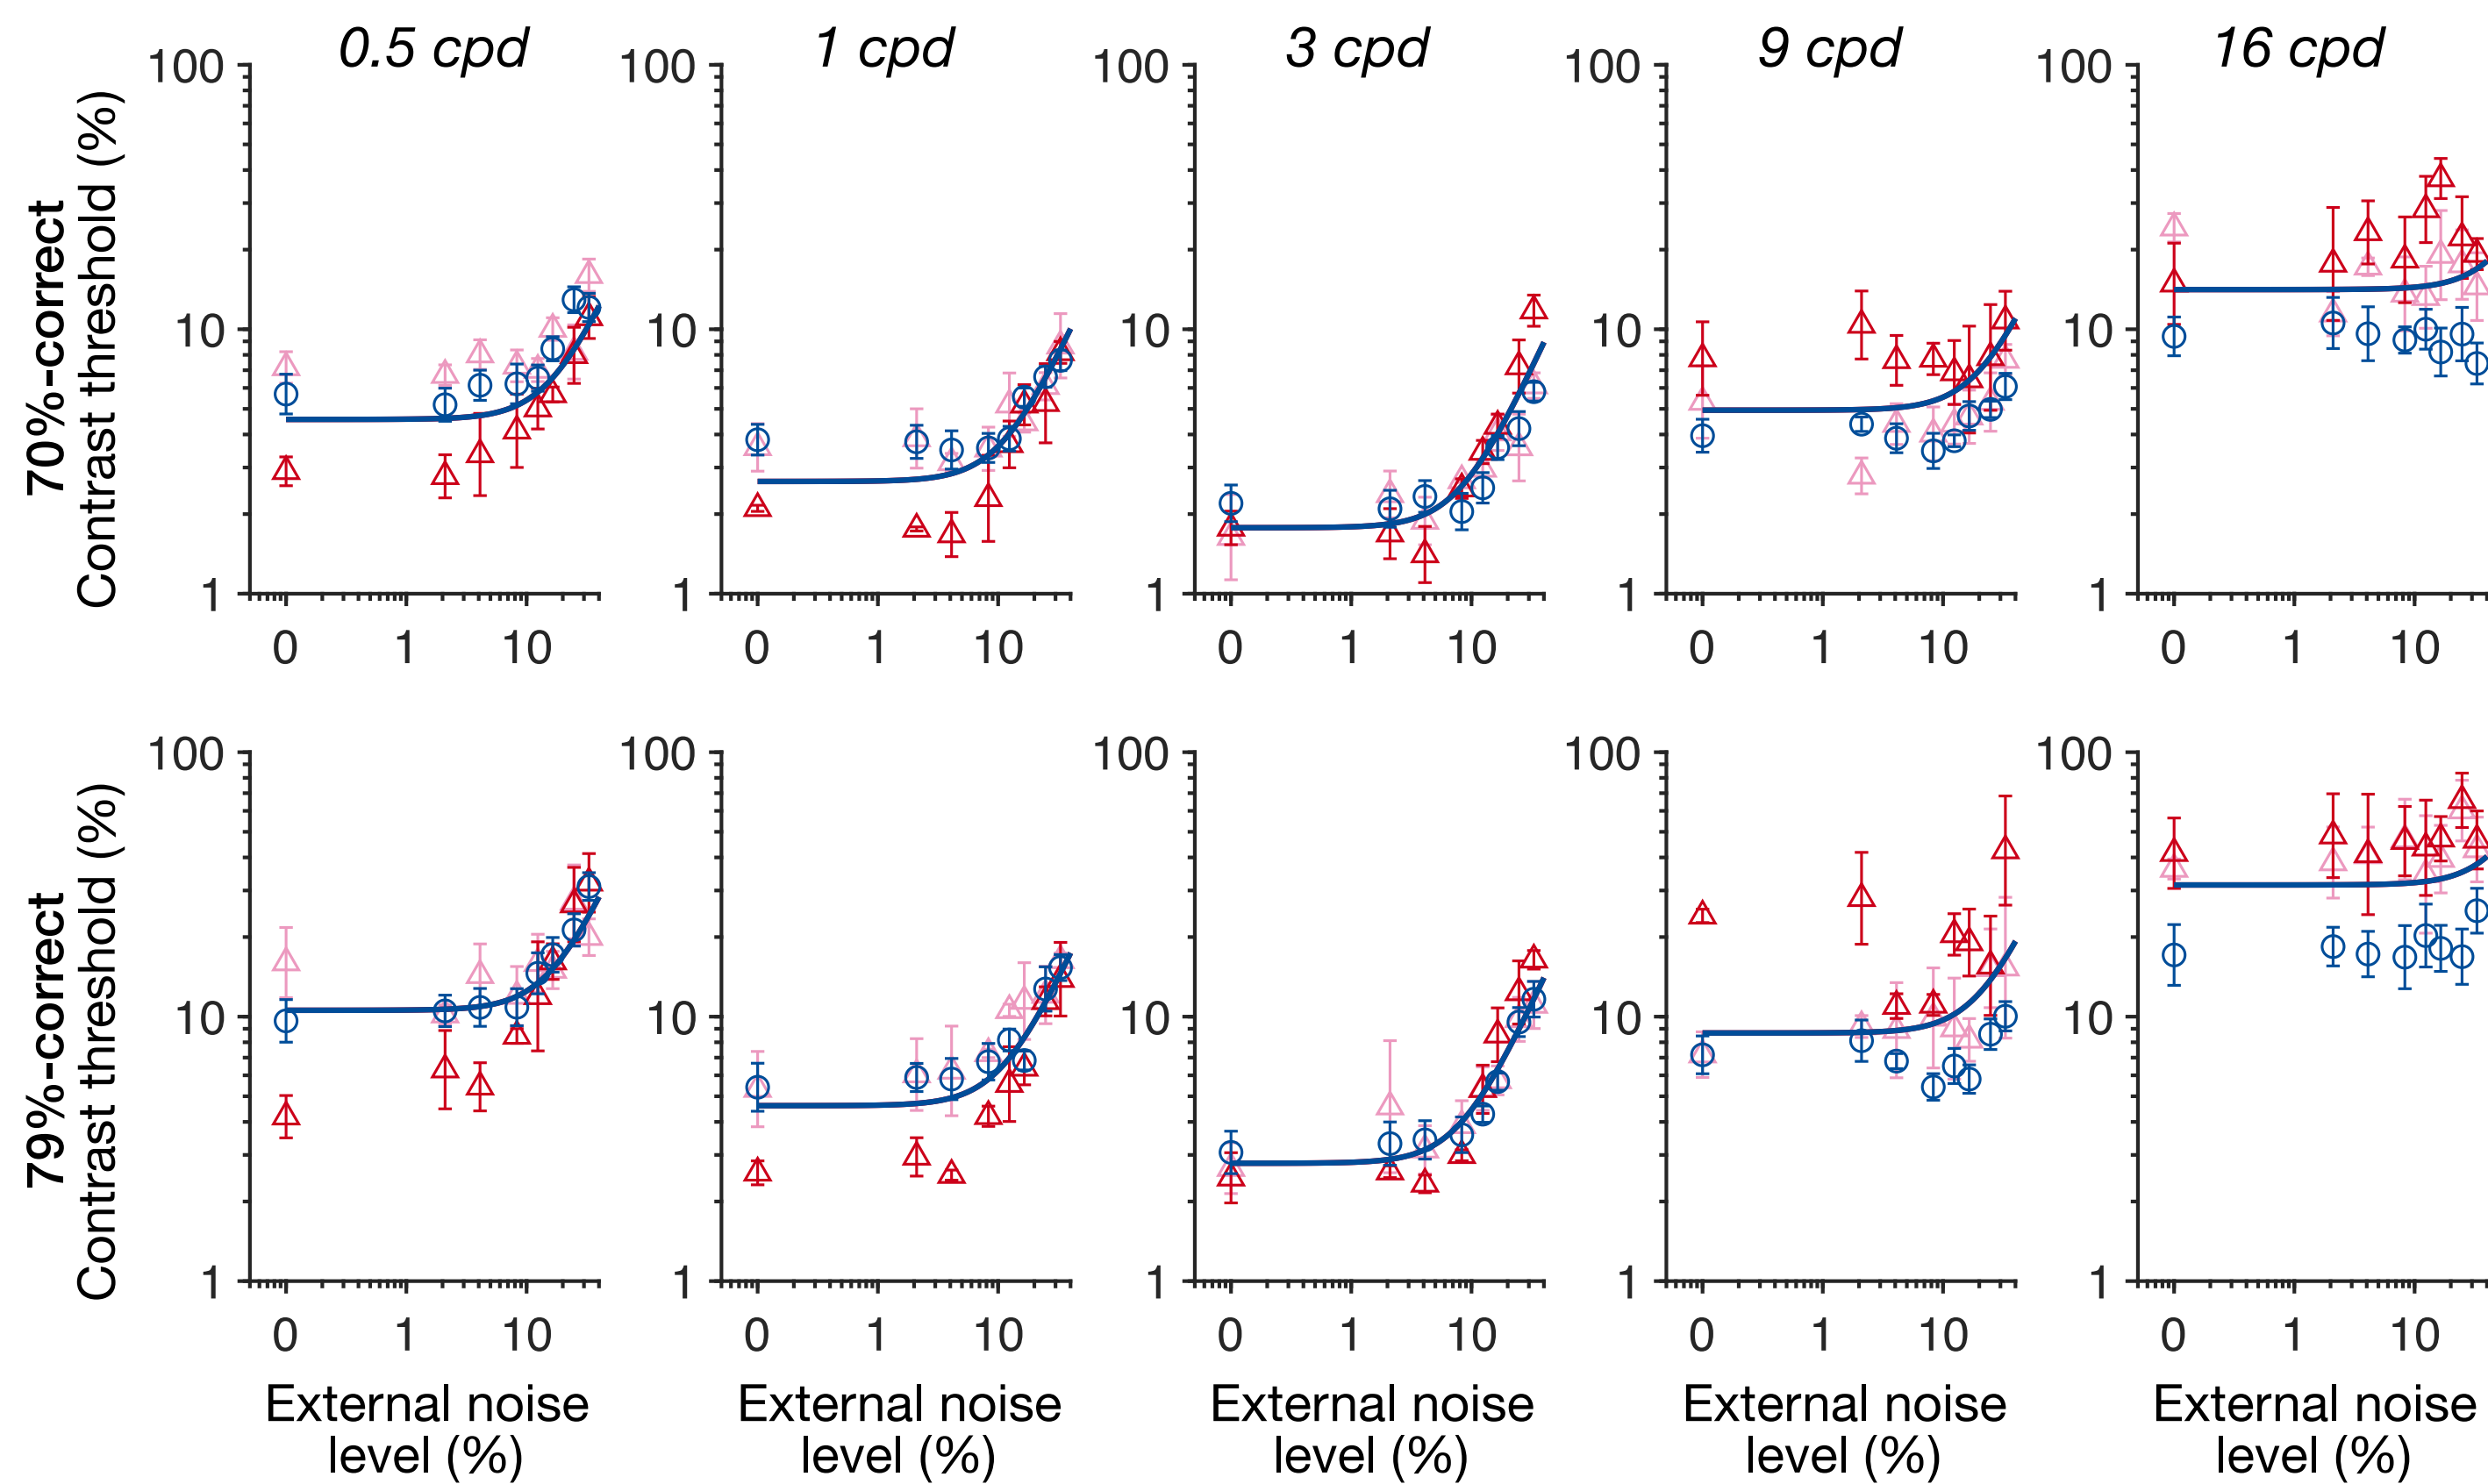

Supplement: supp [file elife_poa_e58734_Figure_7_figure_supplement_4.pdf › elife_poa_e58734_Figure_7_figure_supplement_4.pdf]
