# Supplementary material for: Functional reallocation of sensory processing resources caused by long-term neural adaptation to altered optics
Source: eLife journal article supplement (doi:10.7554/elife.58734), 2021-02-22

# Figure 7- figure supplement 5

**A**

## Low SFs – Internal additive noise

( $A_{add}$ :  $r^2 = 94.85\%$ )

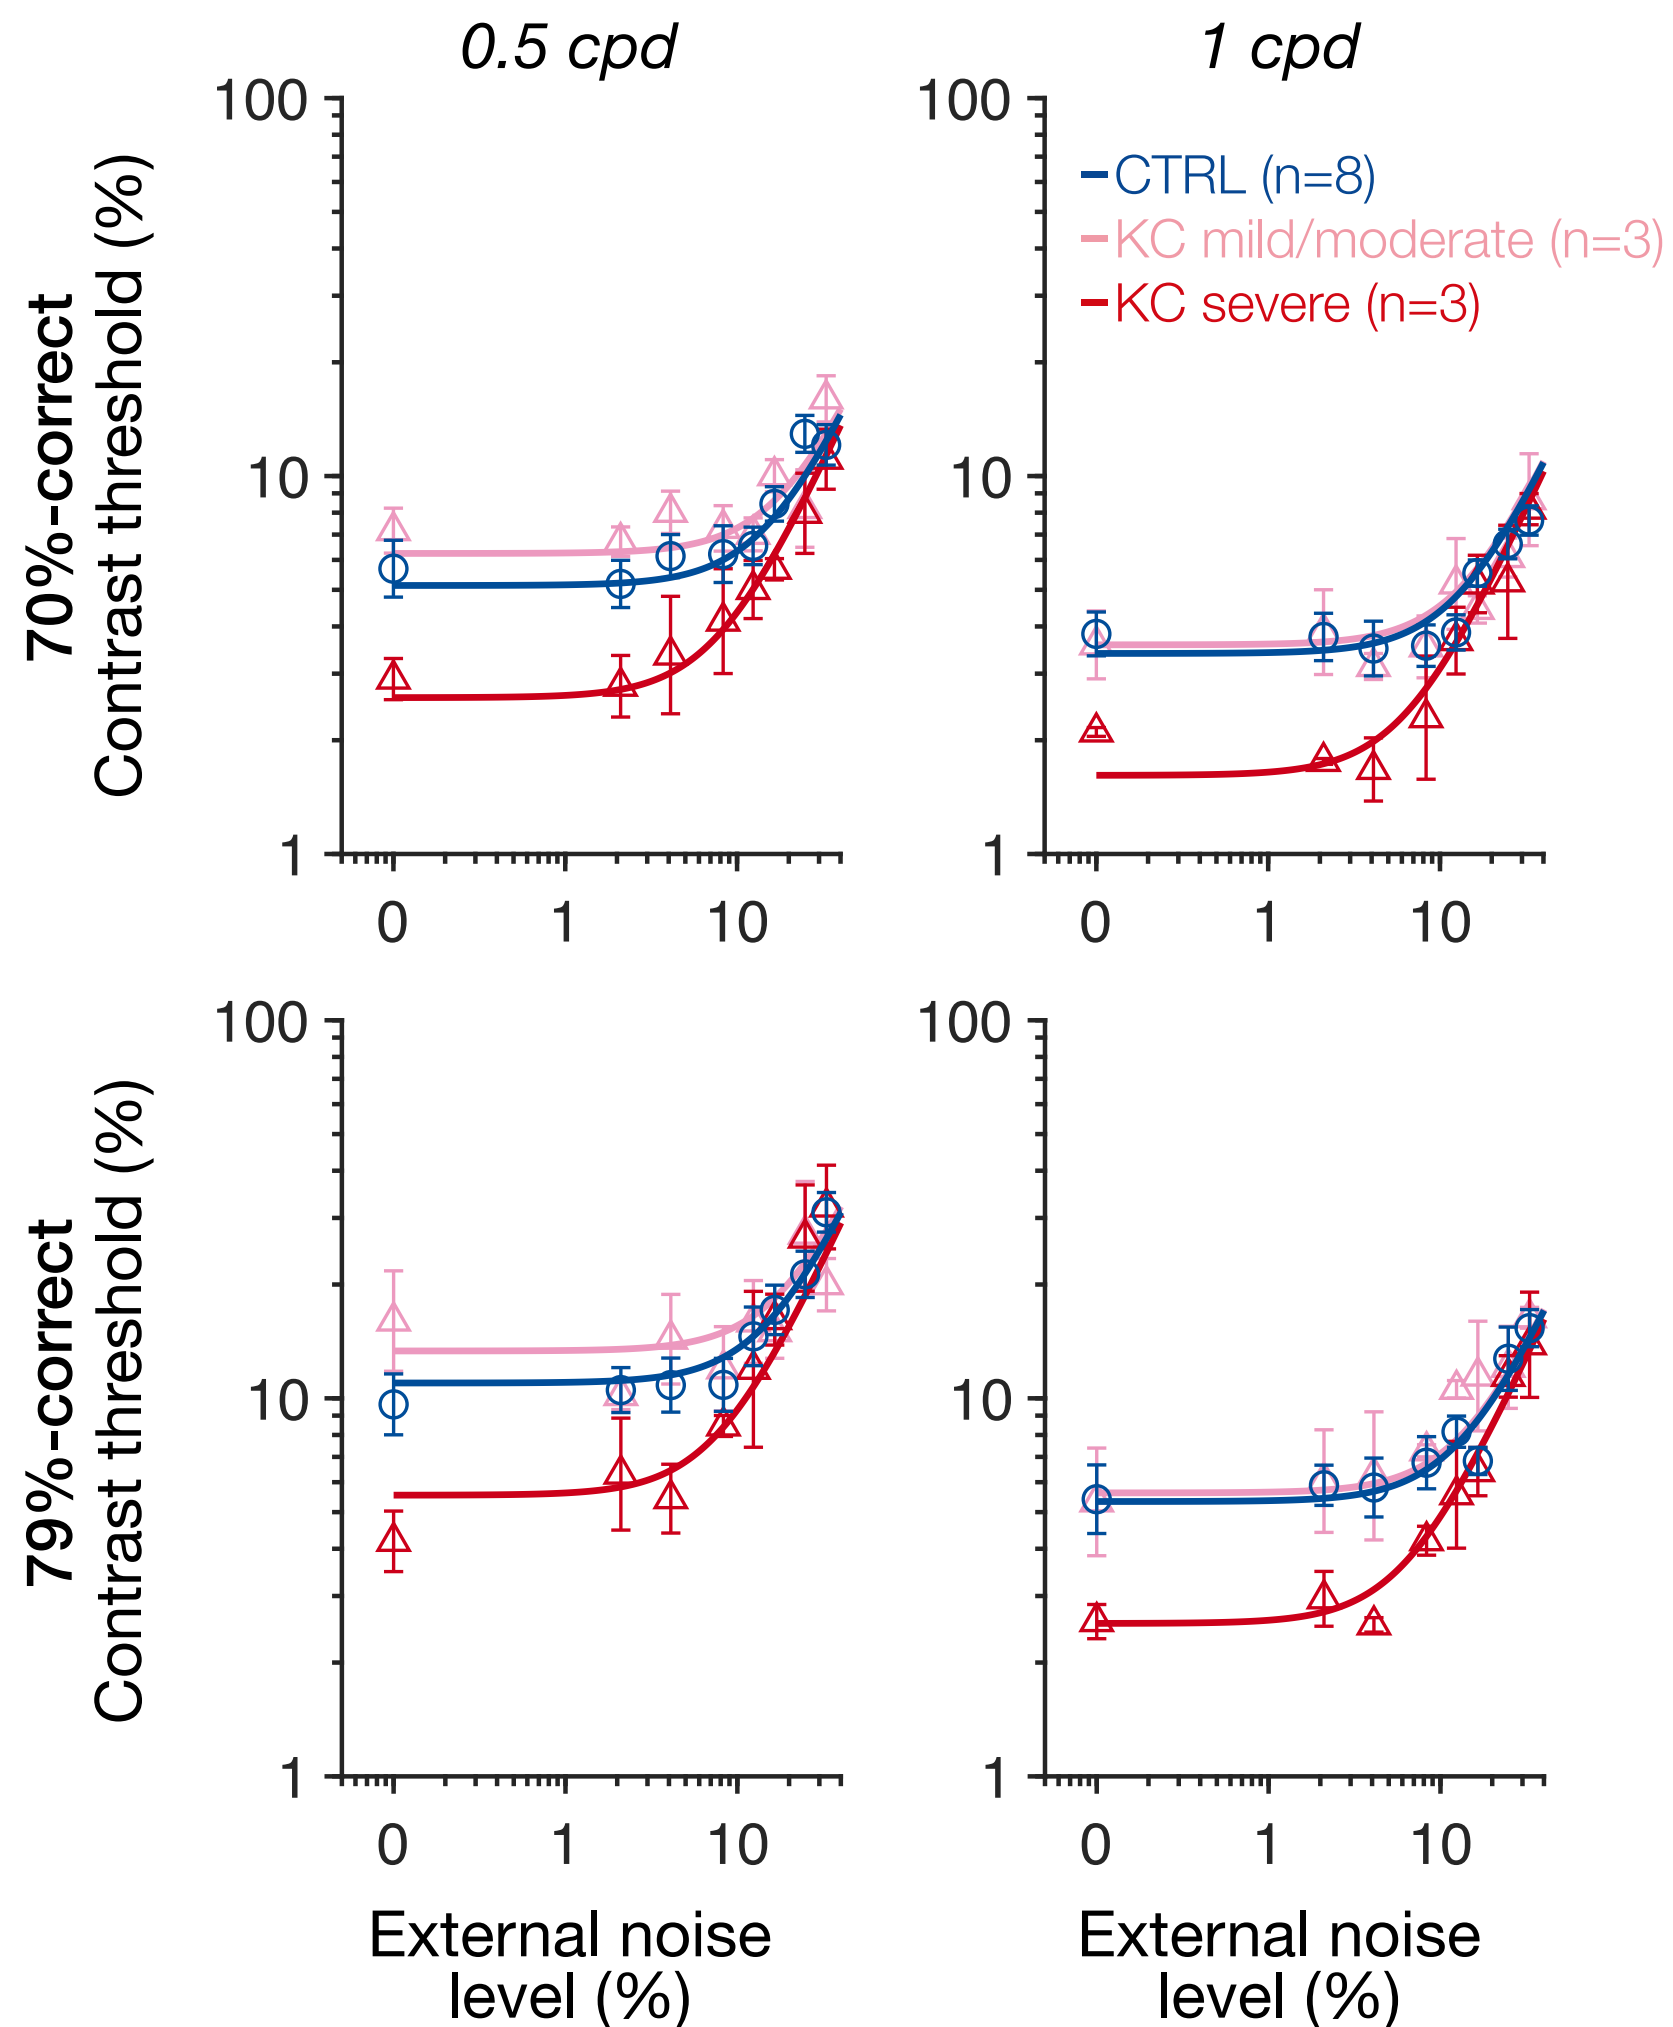

**B**

## Model comparison

Bayesian Information Criterion

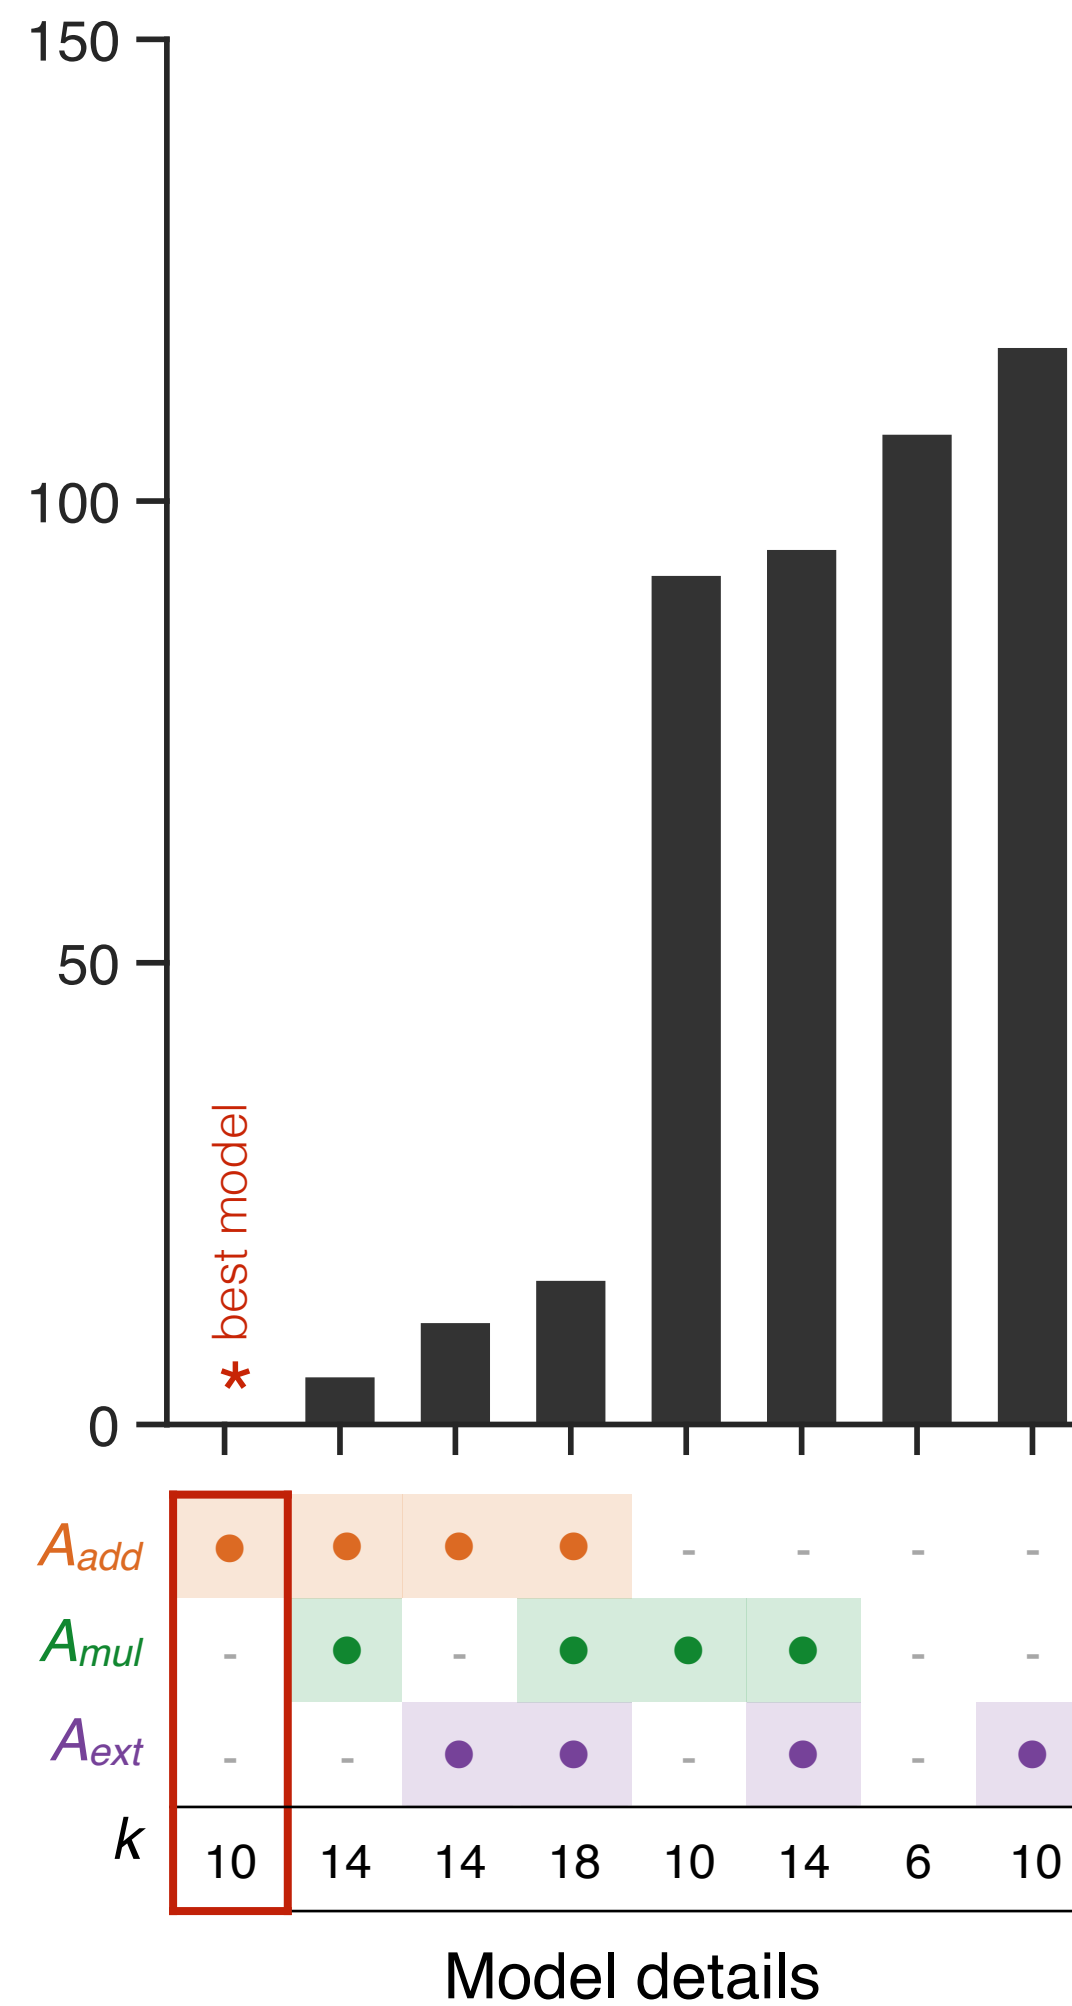

Supplement: supp [file elife_poa_e58734_Figure_7_figure_supplement_5.pdf › elife_poa_e58734_Figure_7_figure_supplement_5.pdf]
