# Supplementary figures and images for: Functional reallocation of sensory processing resources caused by long-term neural adaptation to altered optics
Source: eLife journal article supplement (doi:10.7554/elife.58734), 2021-02-22

Figure 2- figure supplement 2

A

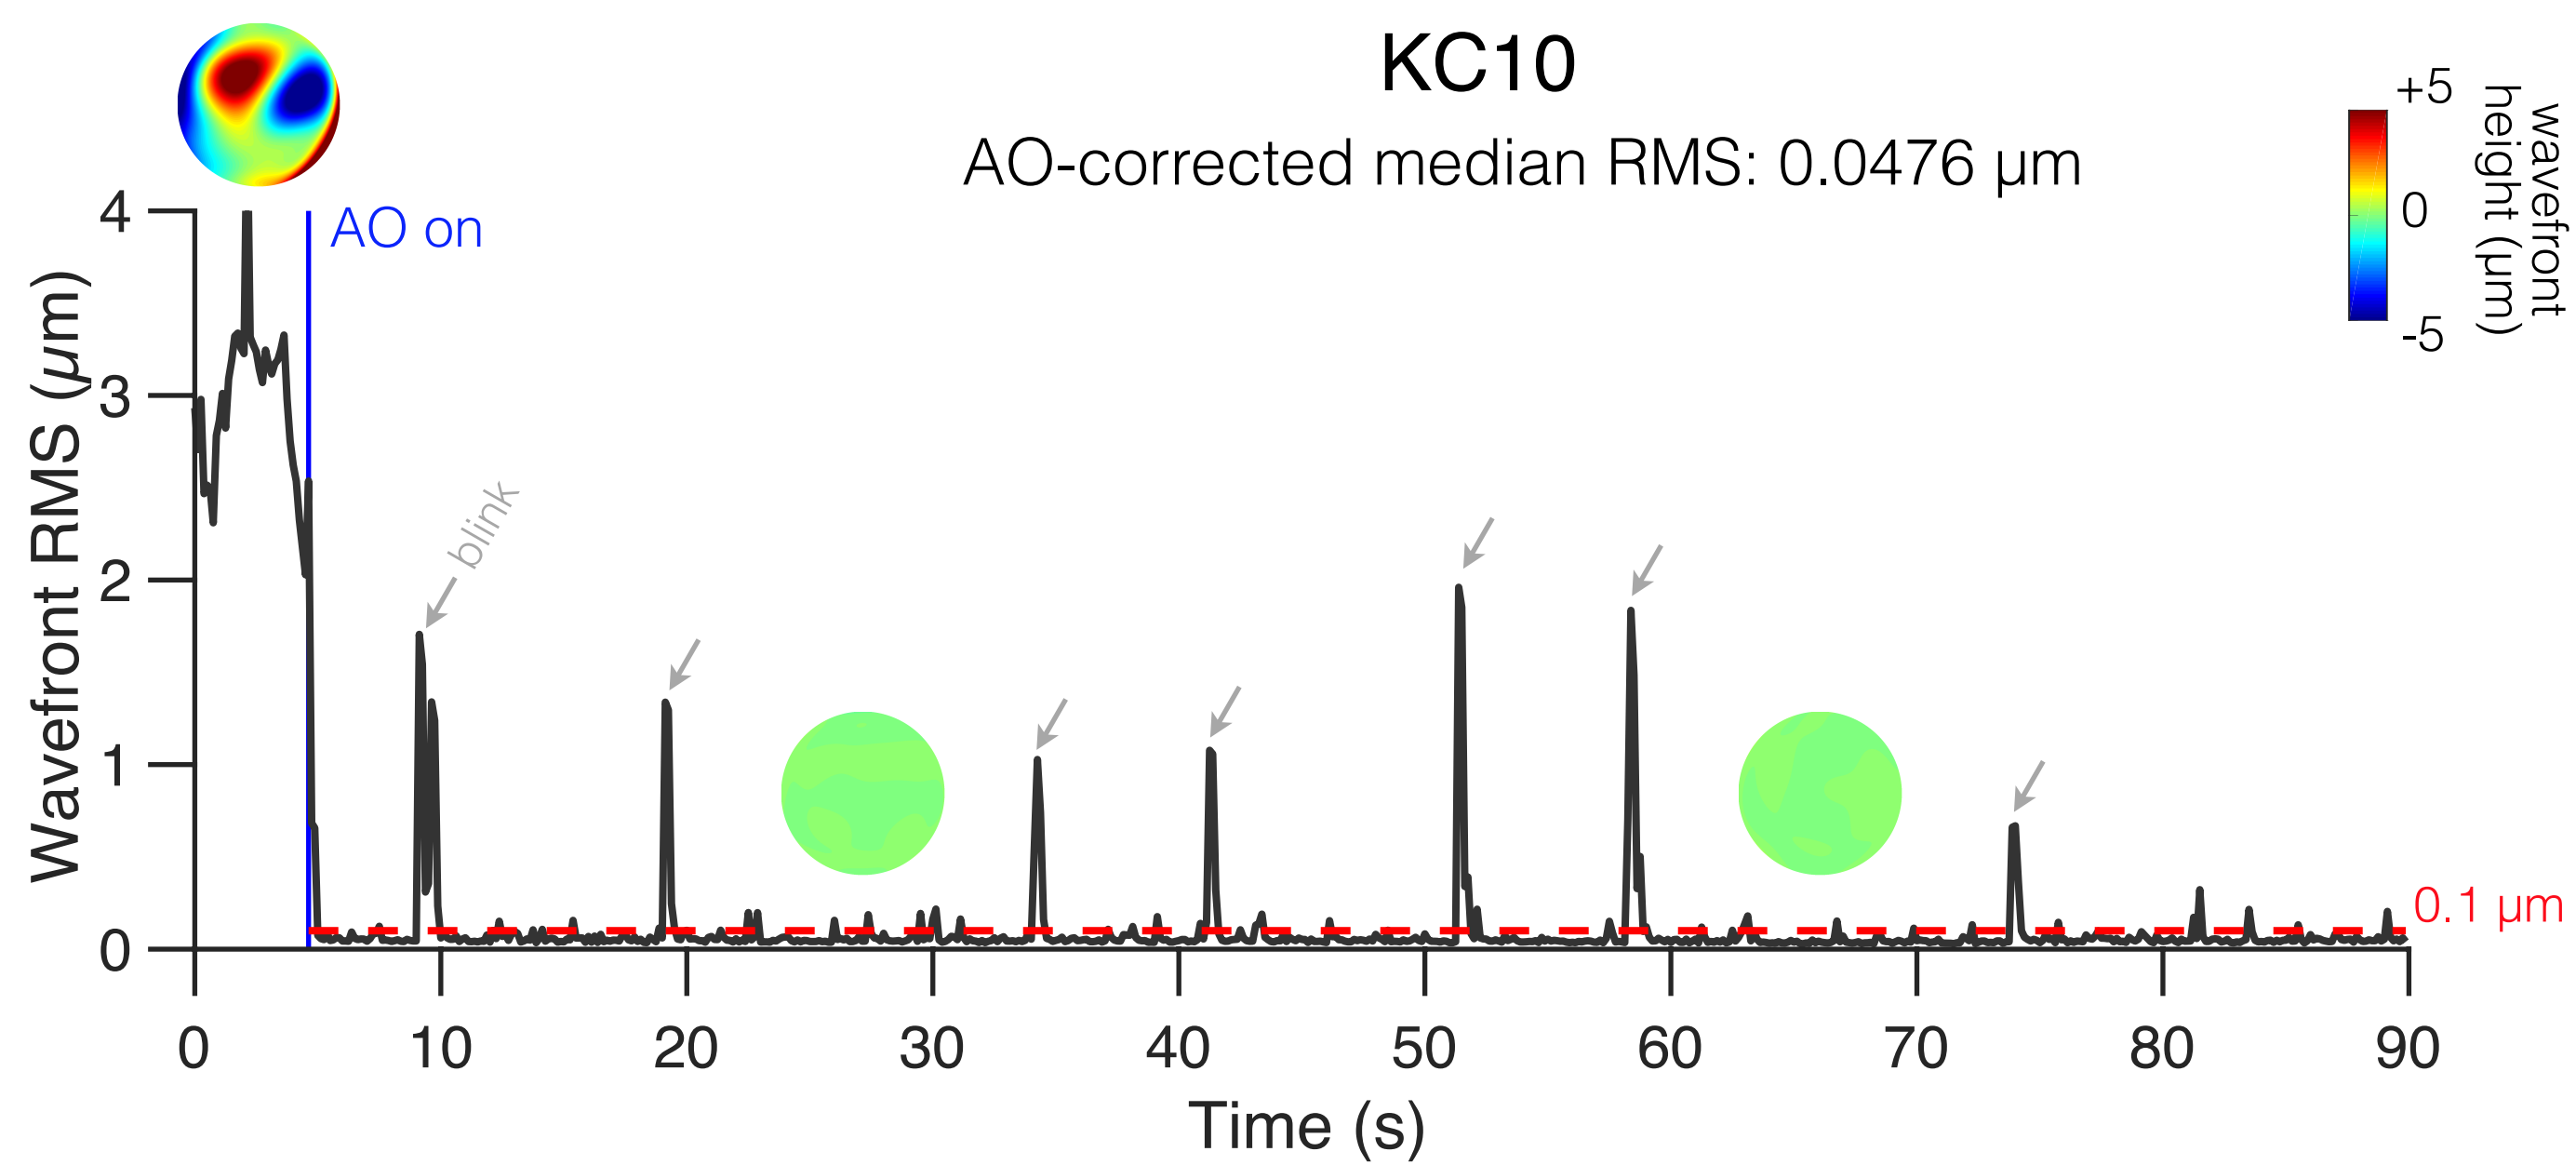

B

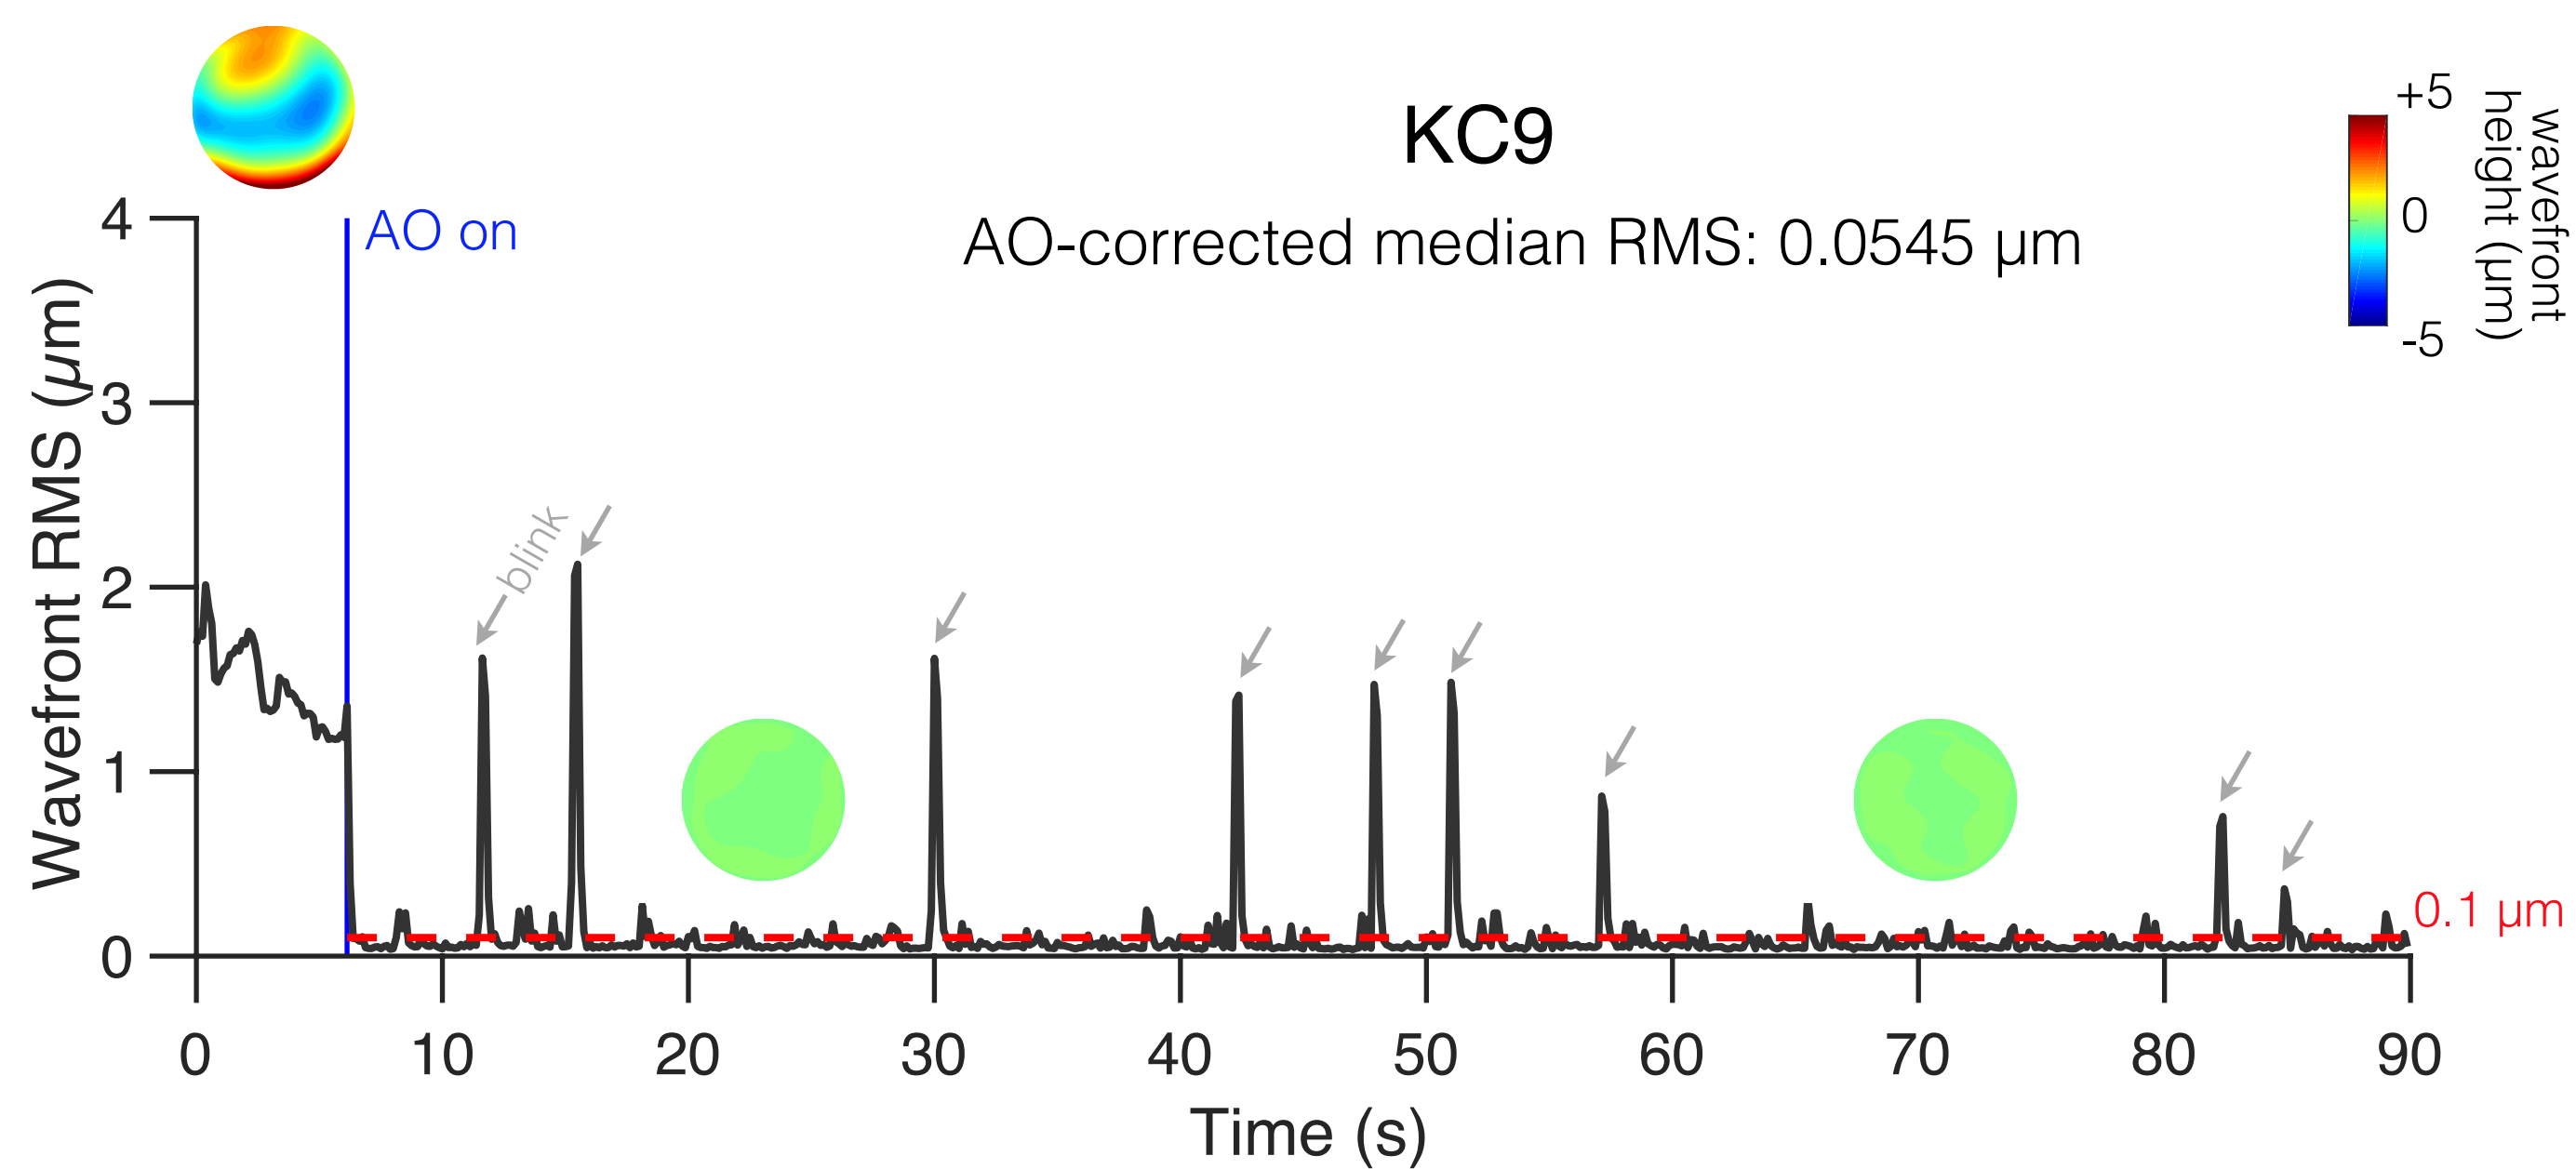

C

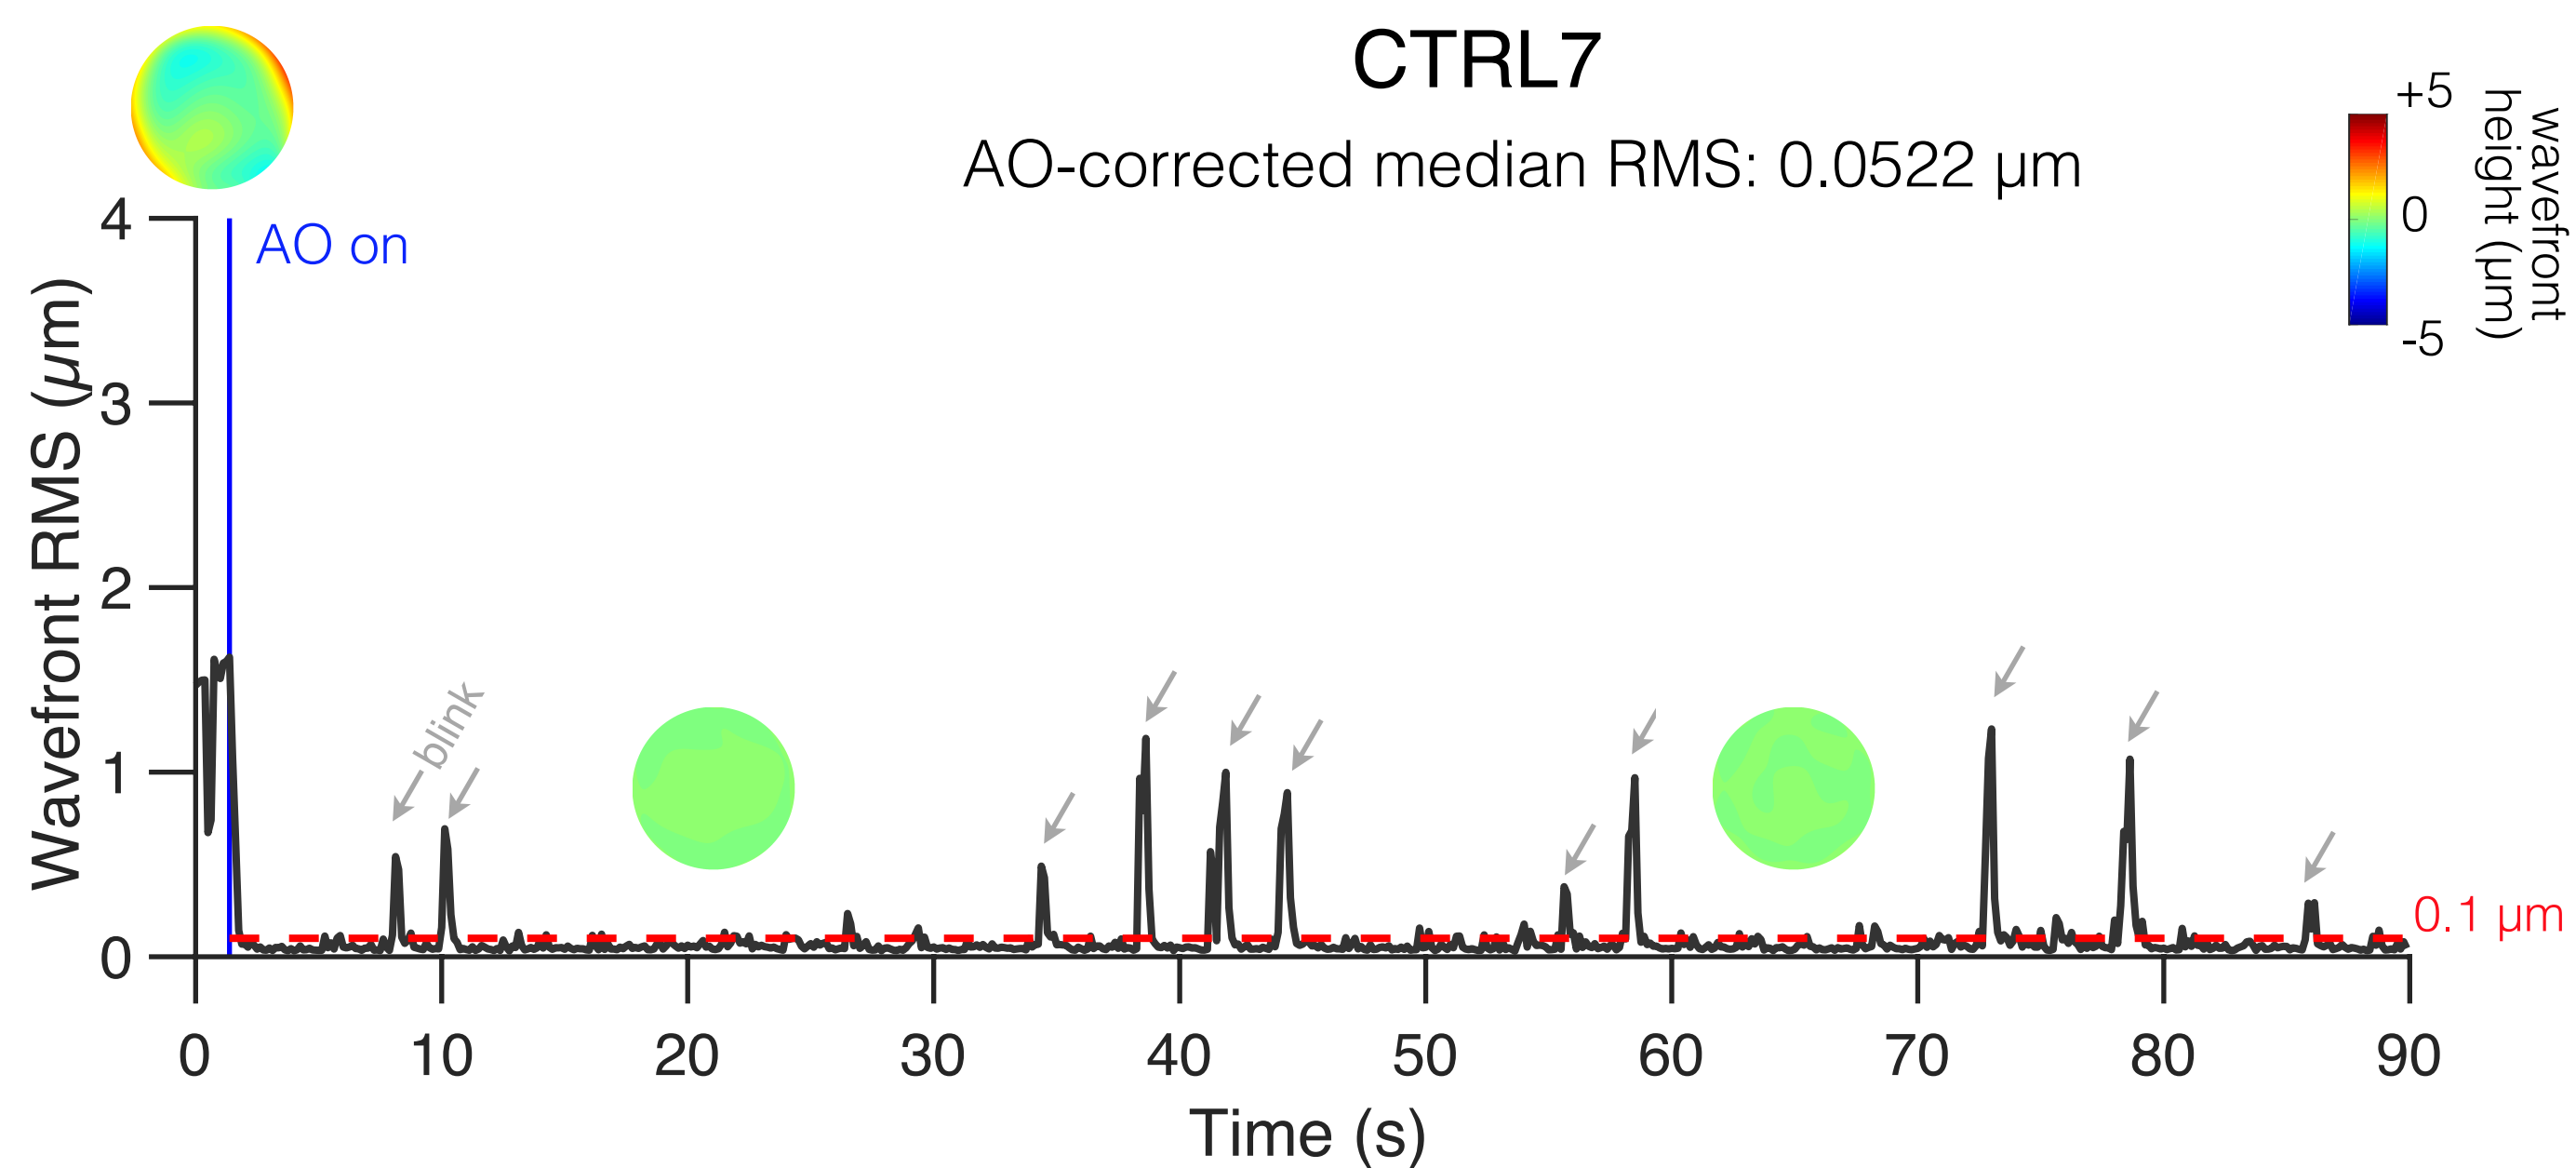

Supplement: supp [file elife_poa_e58734_Figure_2_figure_supplement_2.pdf › elife_poa_e58734_Figure_2_figure_supplement_2.pdf]

Figure 4- figure supplement 1

**A**

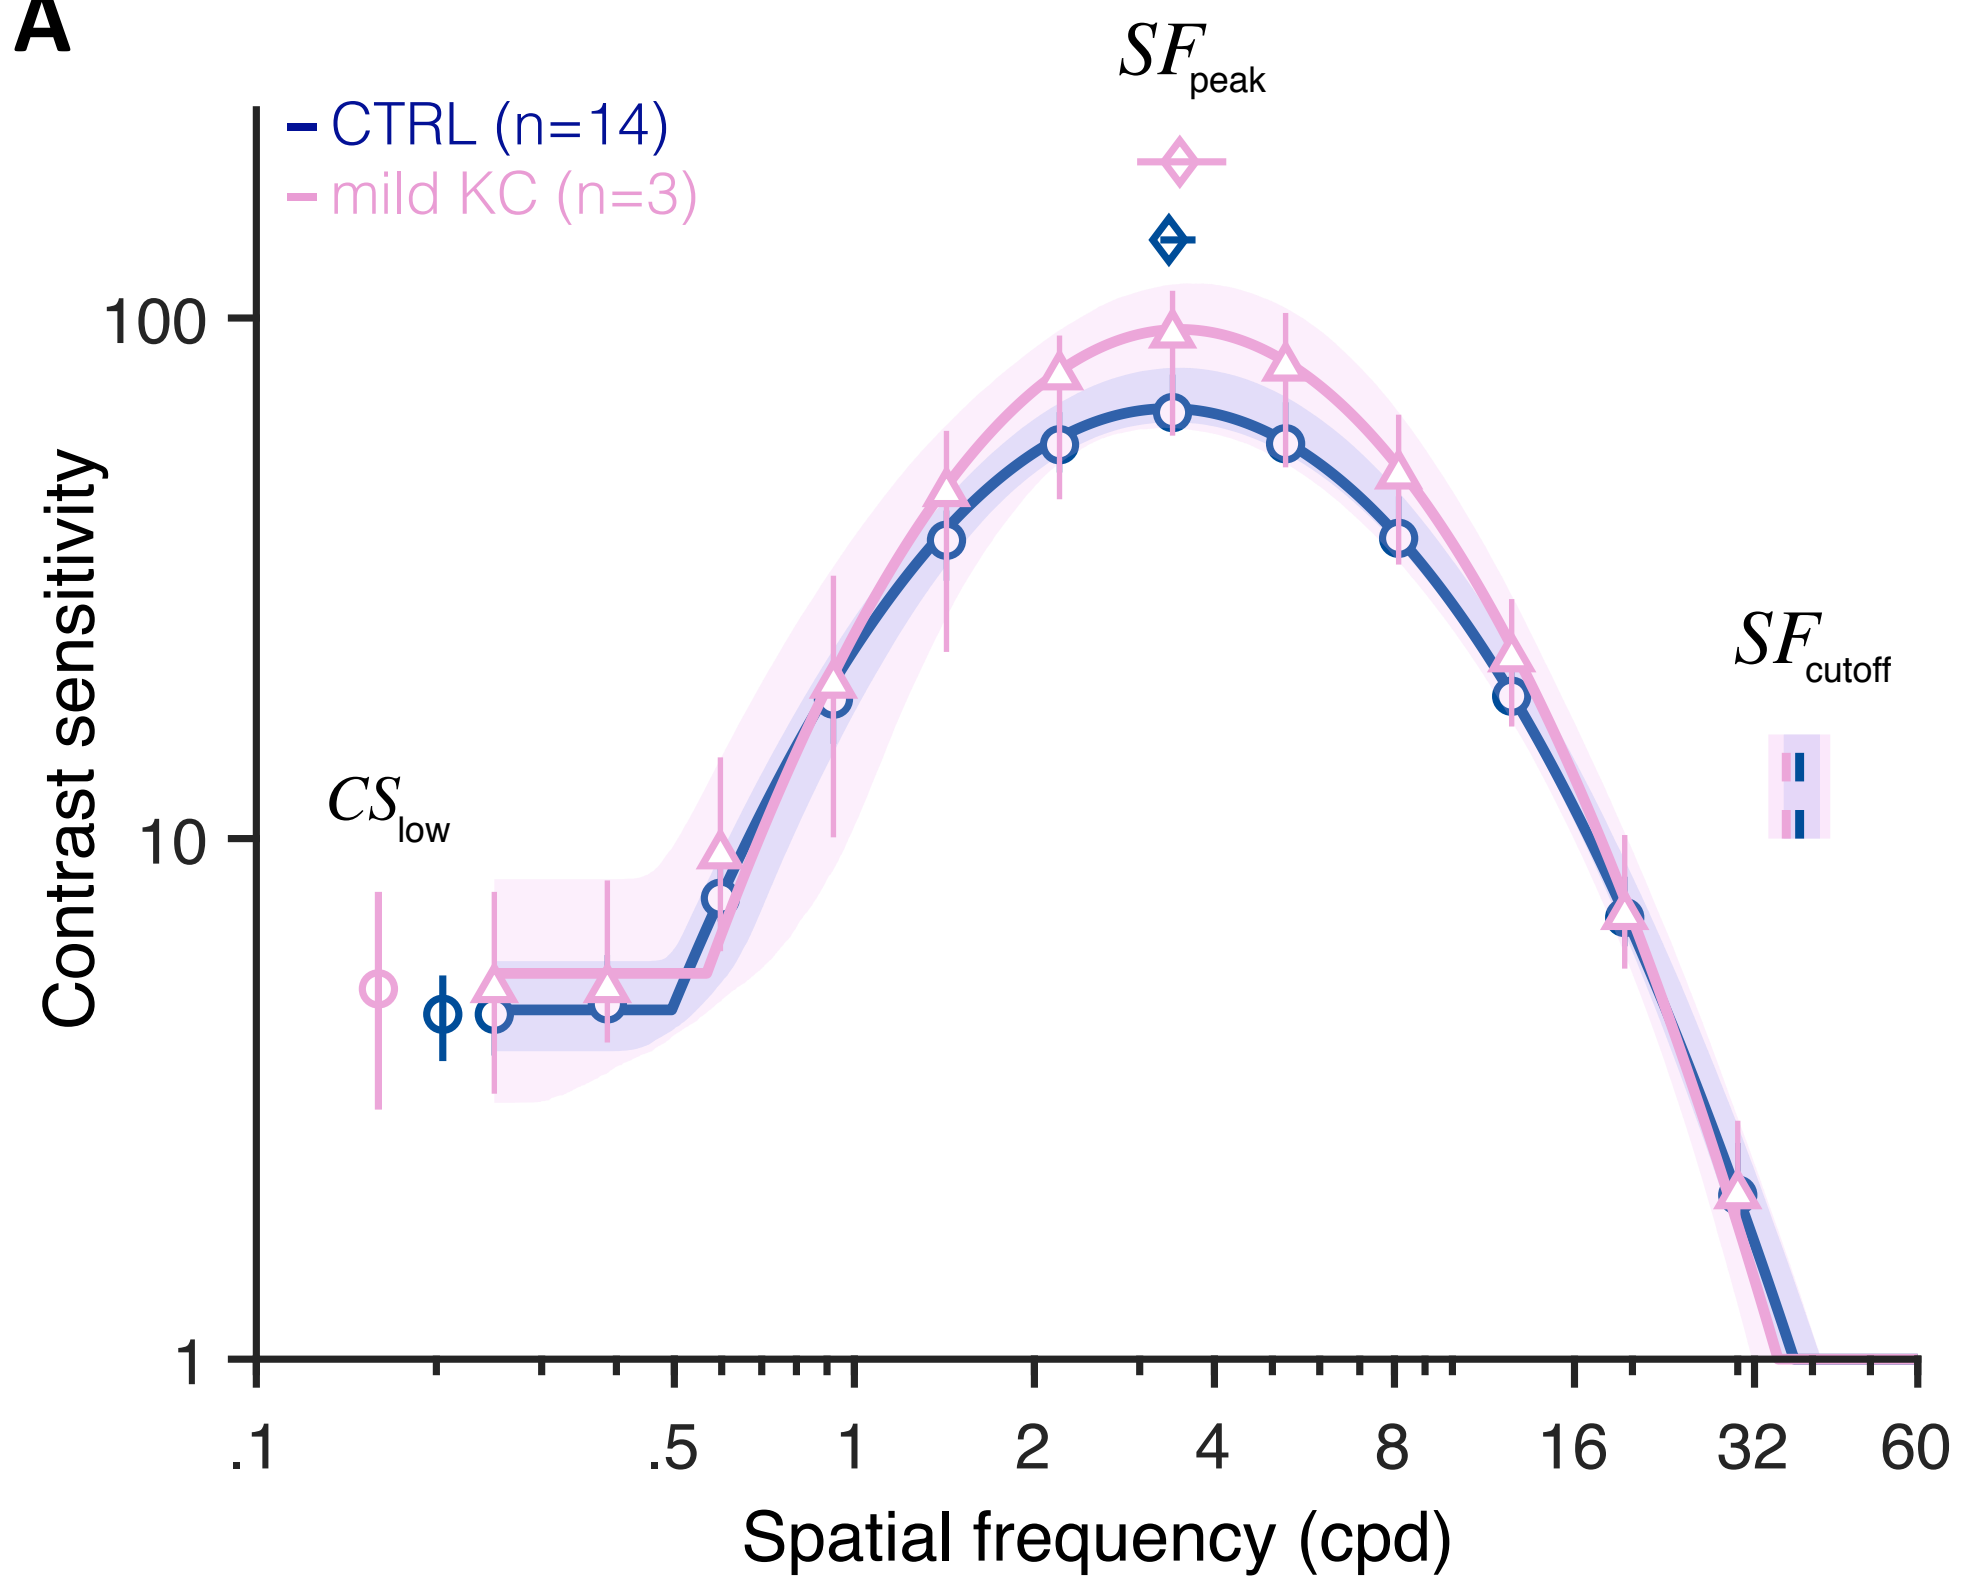

**B**

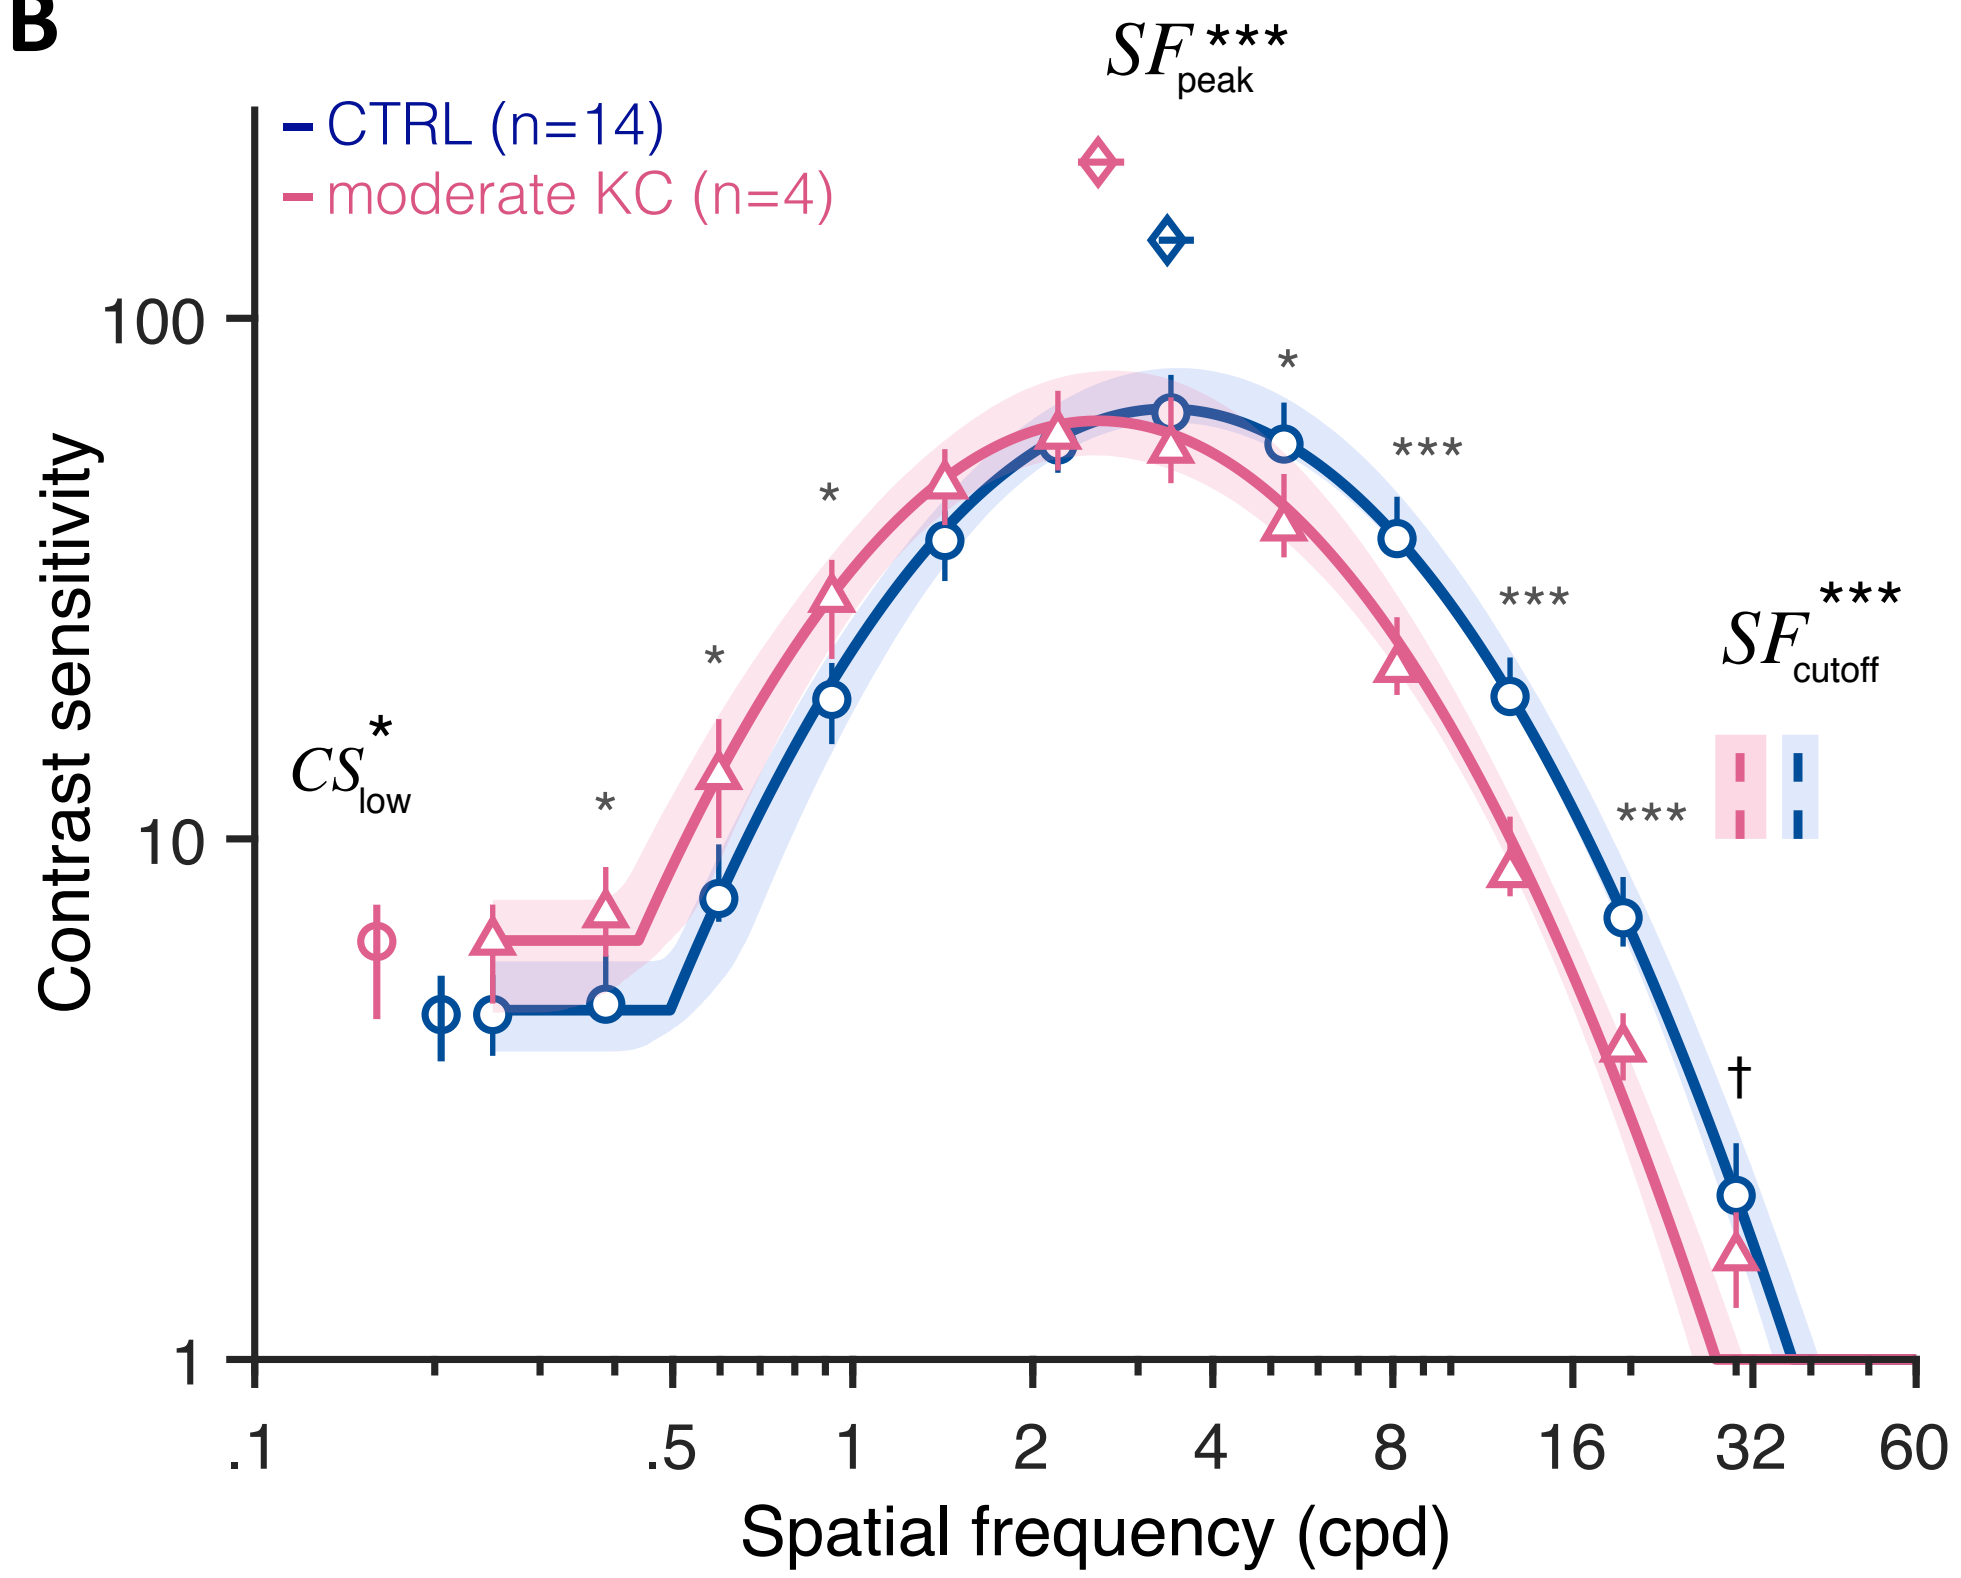

**C**

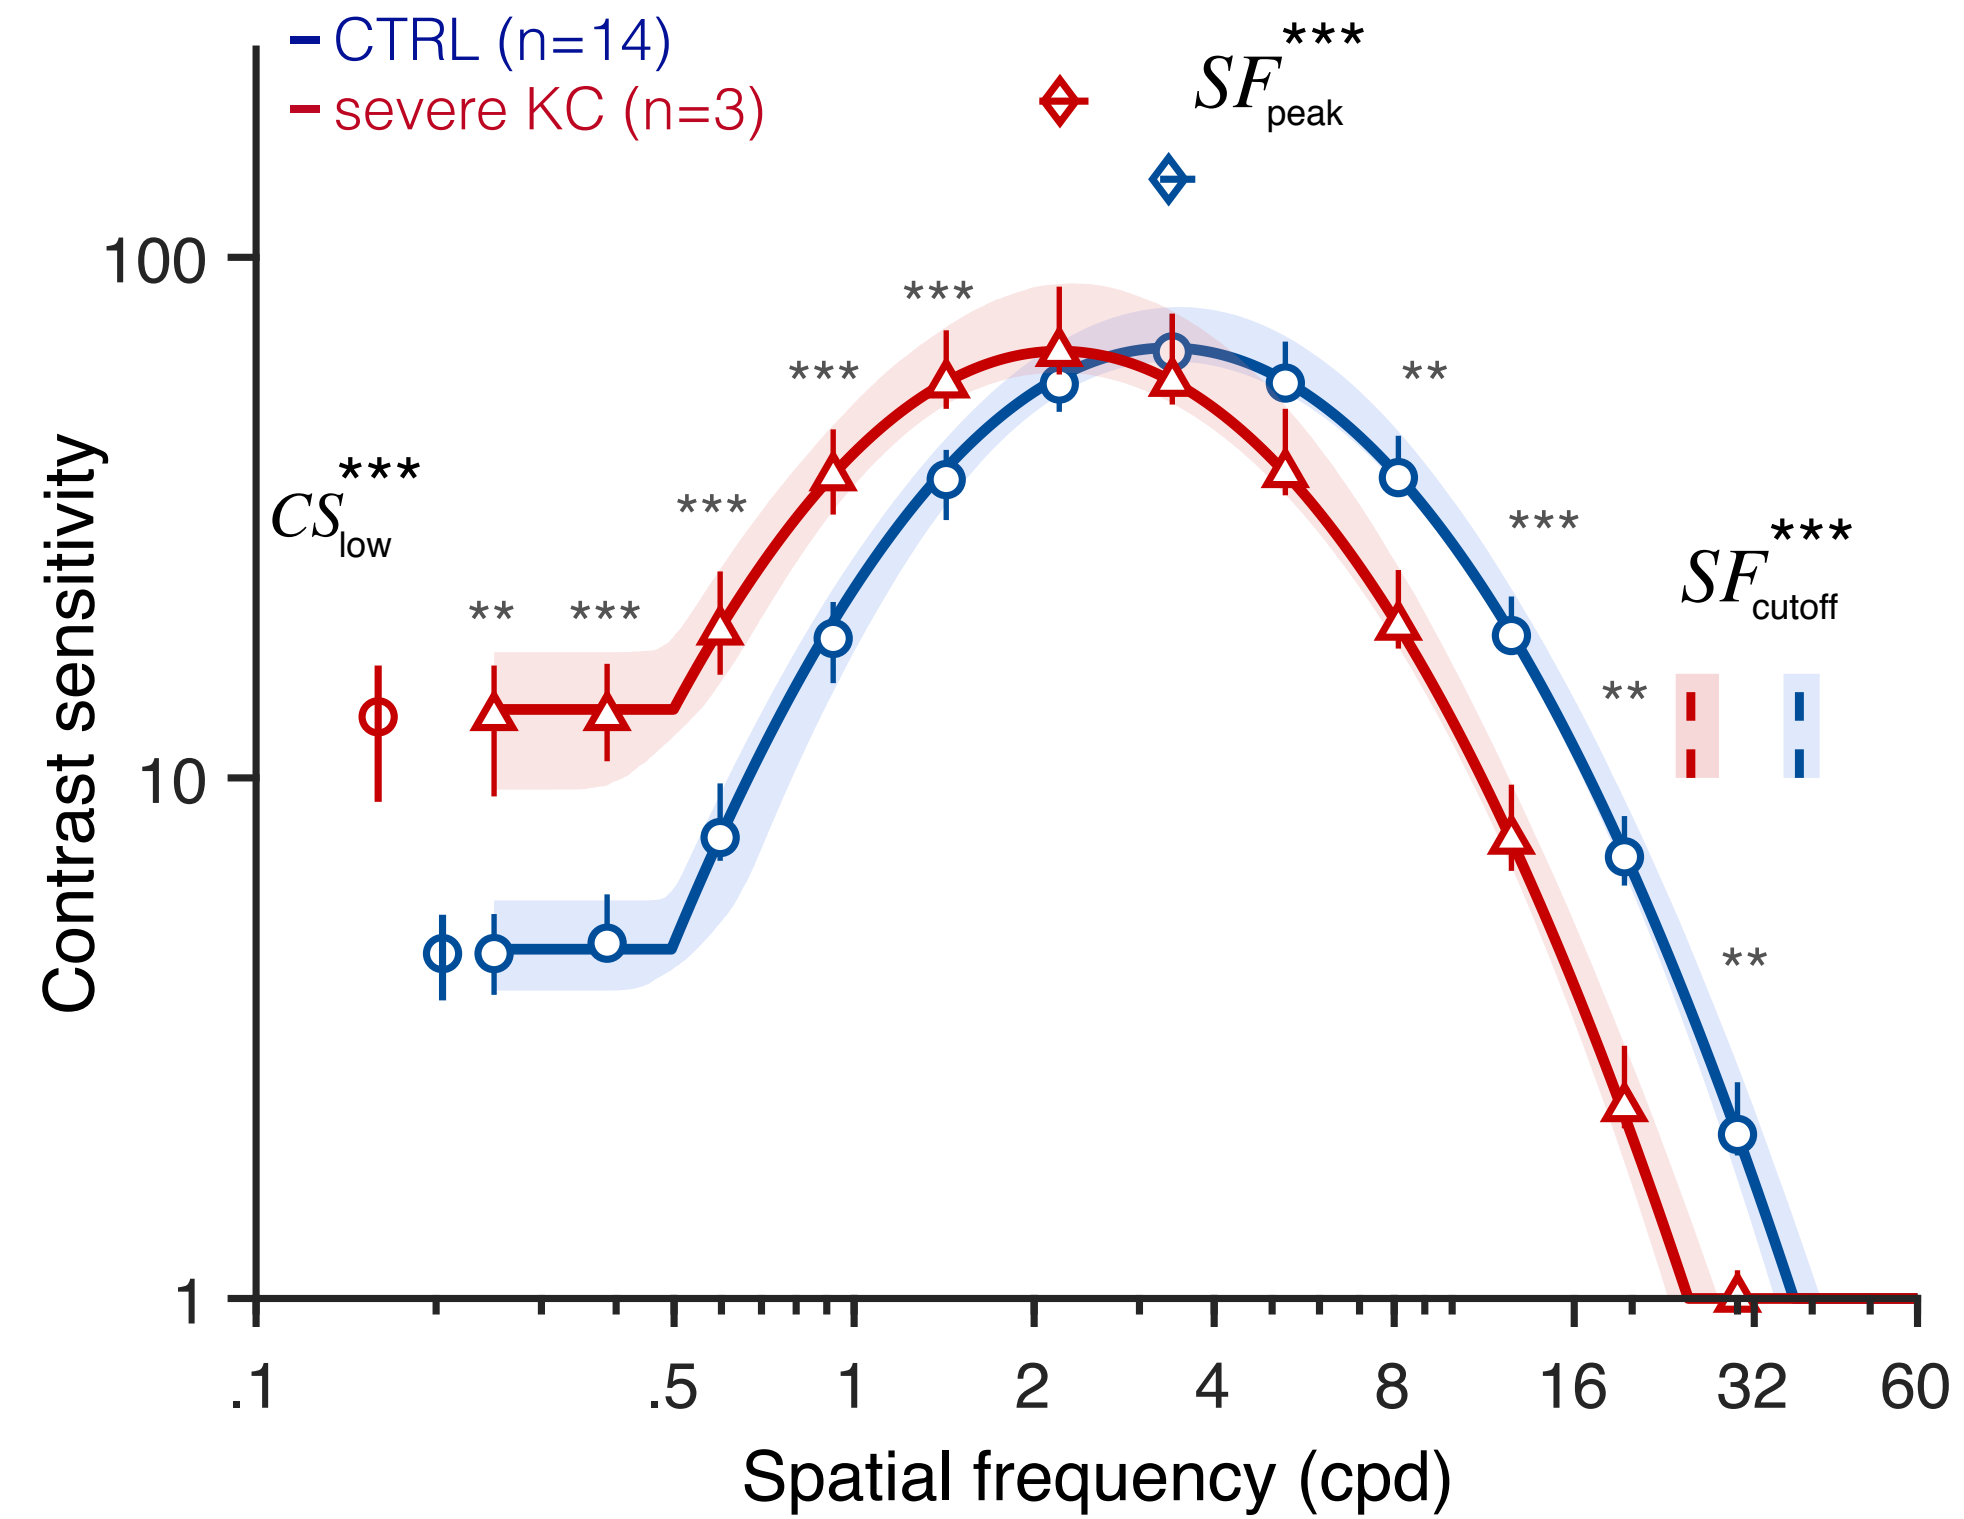

Supplement: supp [file elife_poa_e58734_Figure_4_figure_supplement_1.pdf › elife_poa_e58734_Figure_4_figure_supplement_1.pdf]

Figure 4- figure supplement 2

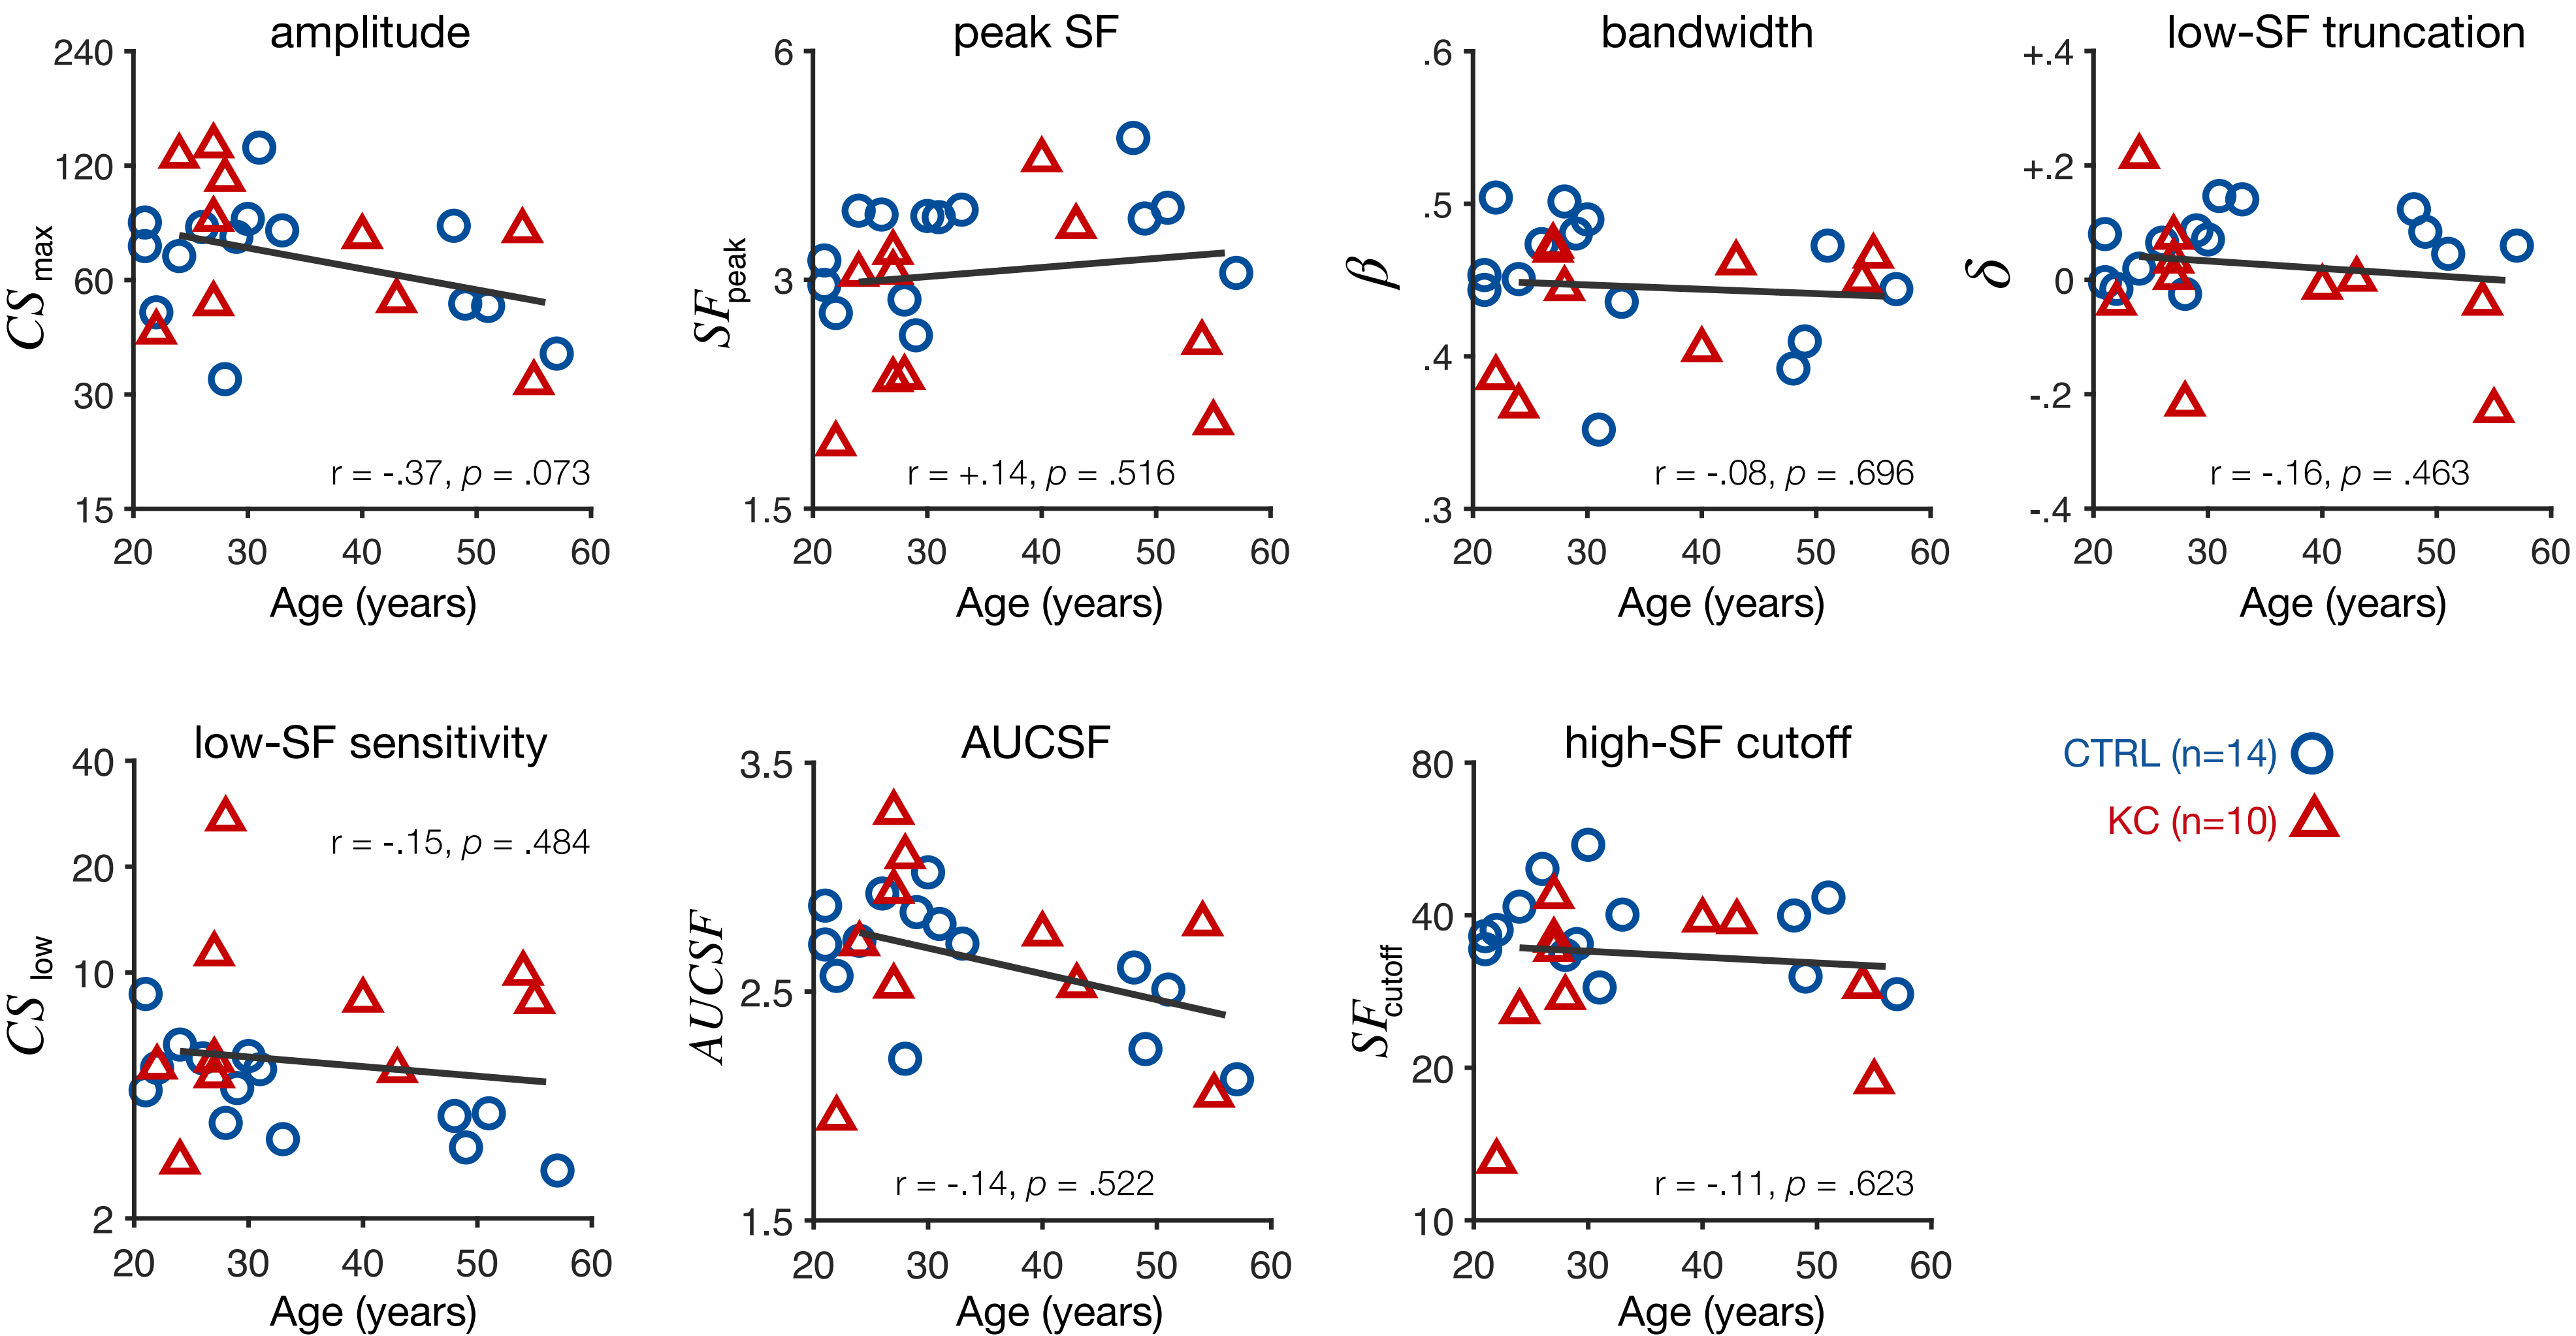

Supplement: supp [file elife_poa_e58734_Figure_4_figure_supplement_2.pdf › elife_poa_e58734_Figure_4_figure_supplement_2.pdf]

Figure 5- figure supplement 1

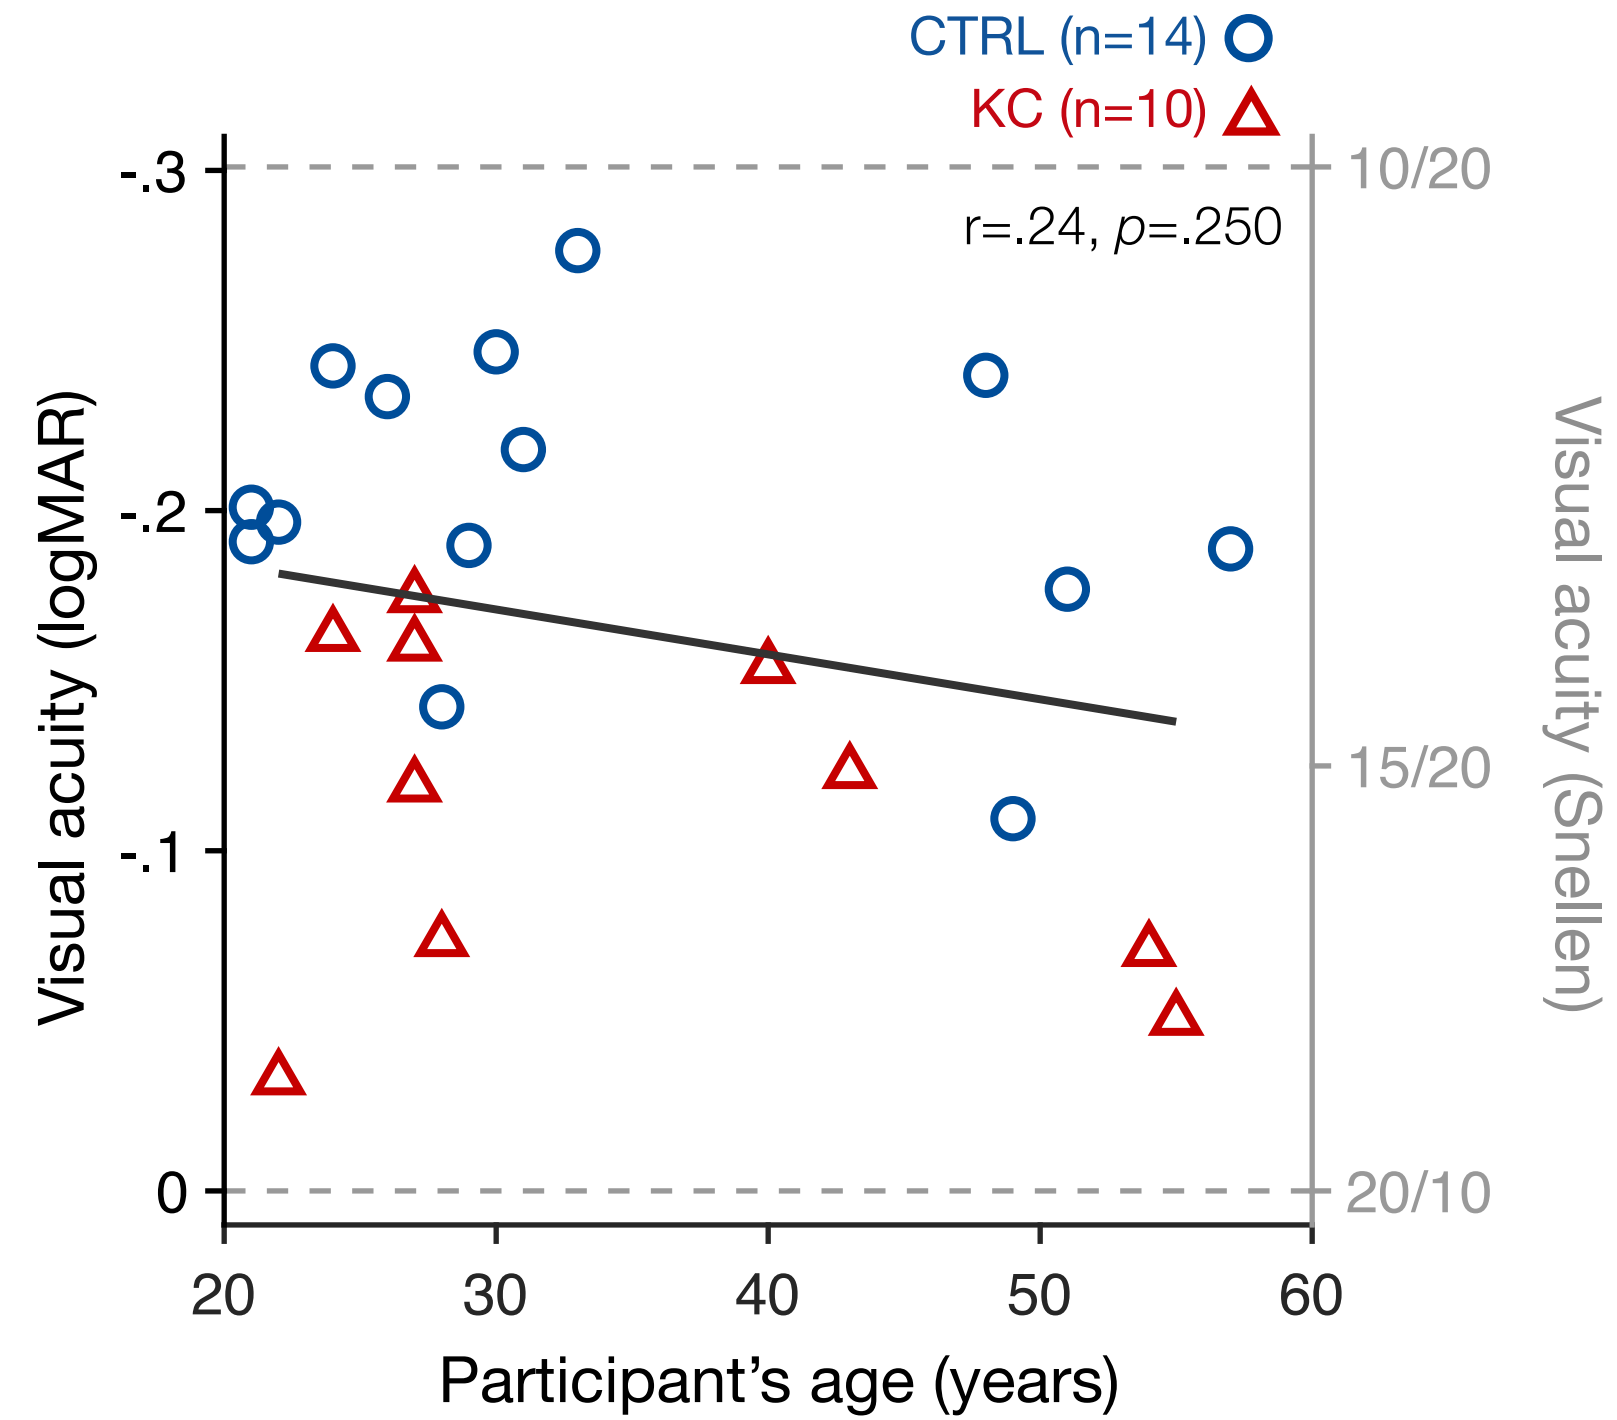

Supplement: supp [file elife_poa_e58734_Figure_5_figure_supplement_1.pdf › elife_poa_e58734_Figure_5_figure_supplement_1.pdf]

Figure 7- figure supplement 2

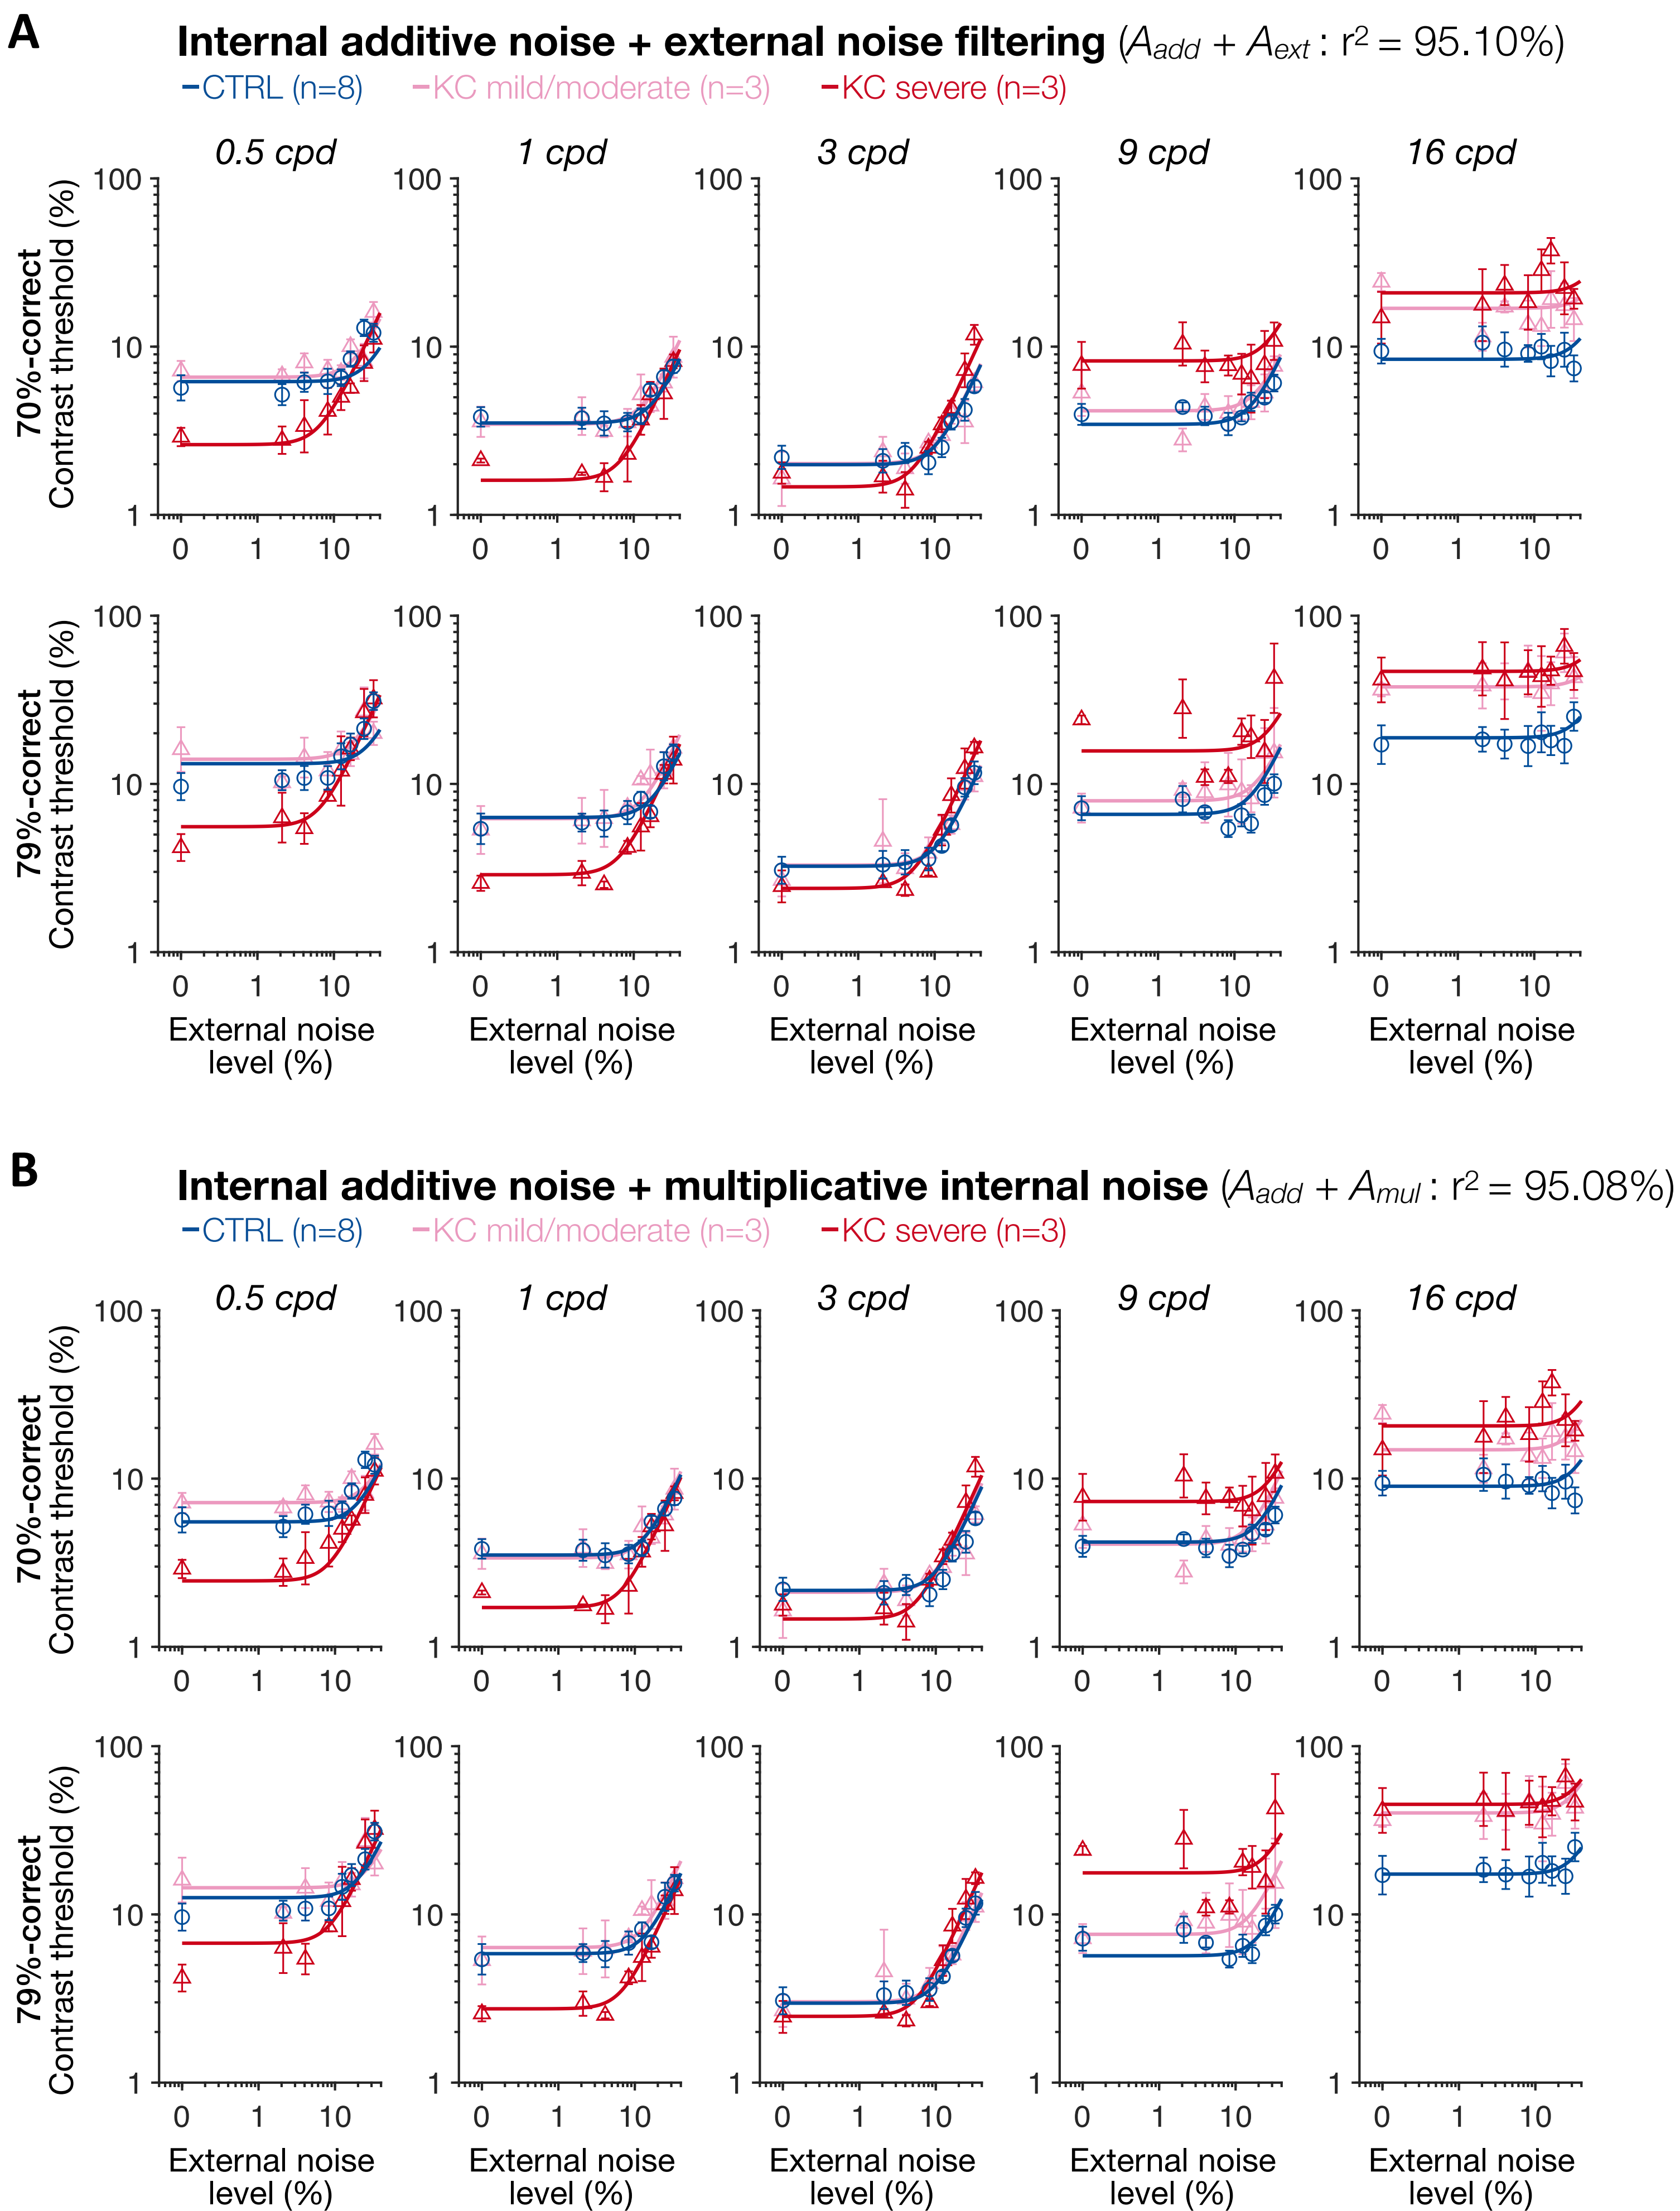

Supplement: supp [file elife_poa_e58734_Figure_7_figure_supplement_2.pdf › elife_poa_e58734_Figure_7_figure_supplement_2.pdf]

# Figure 7- figure supplement 7

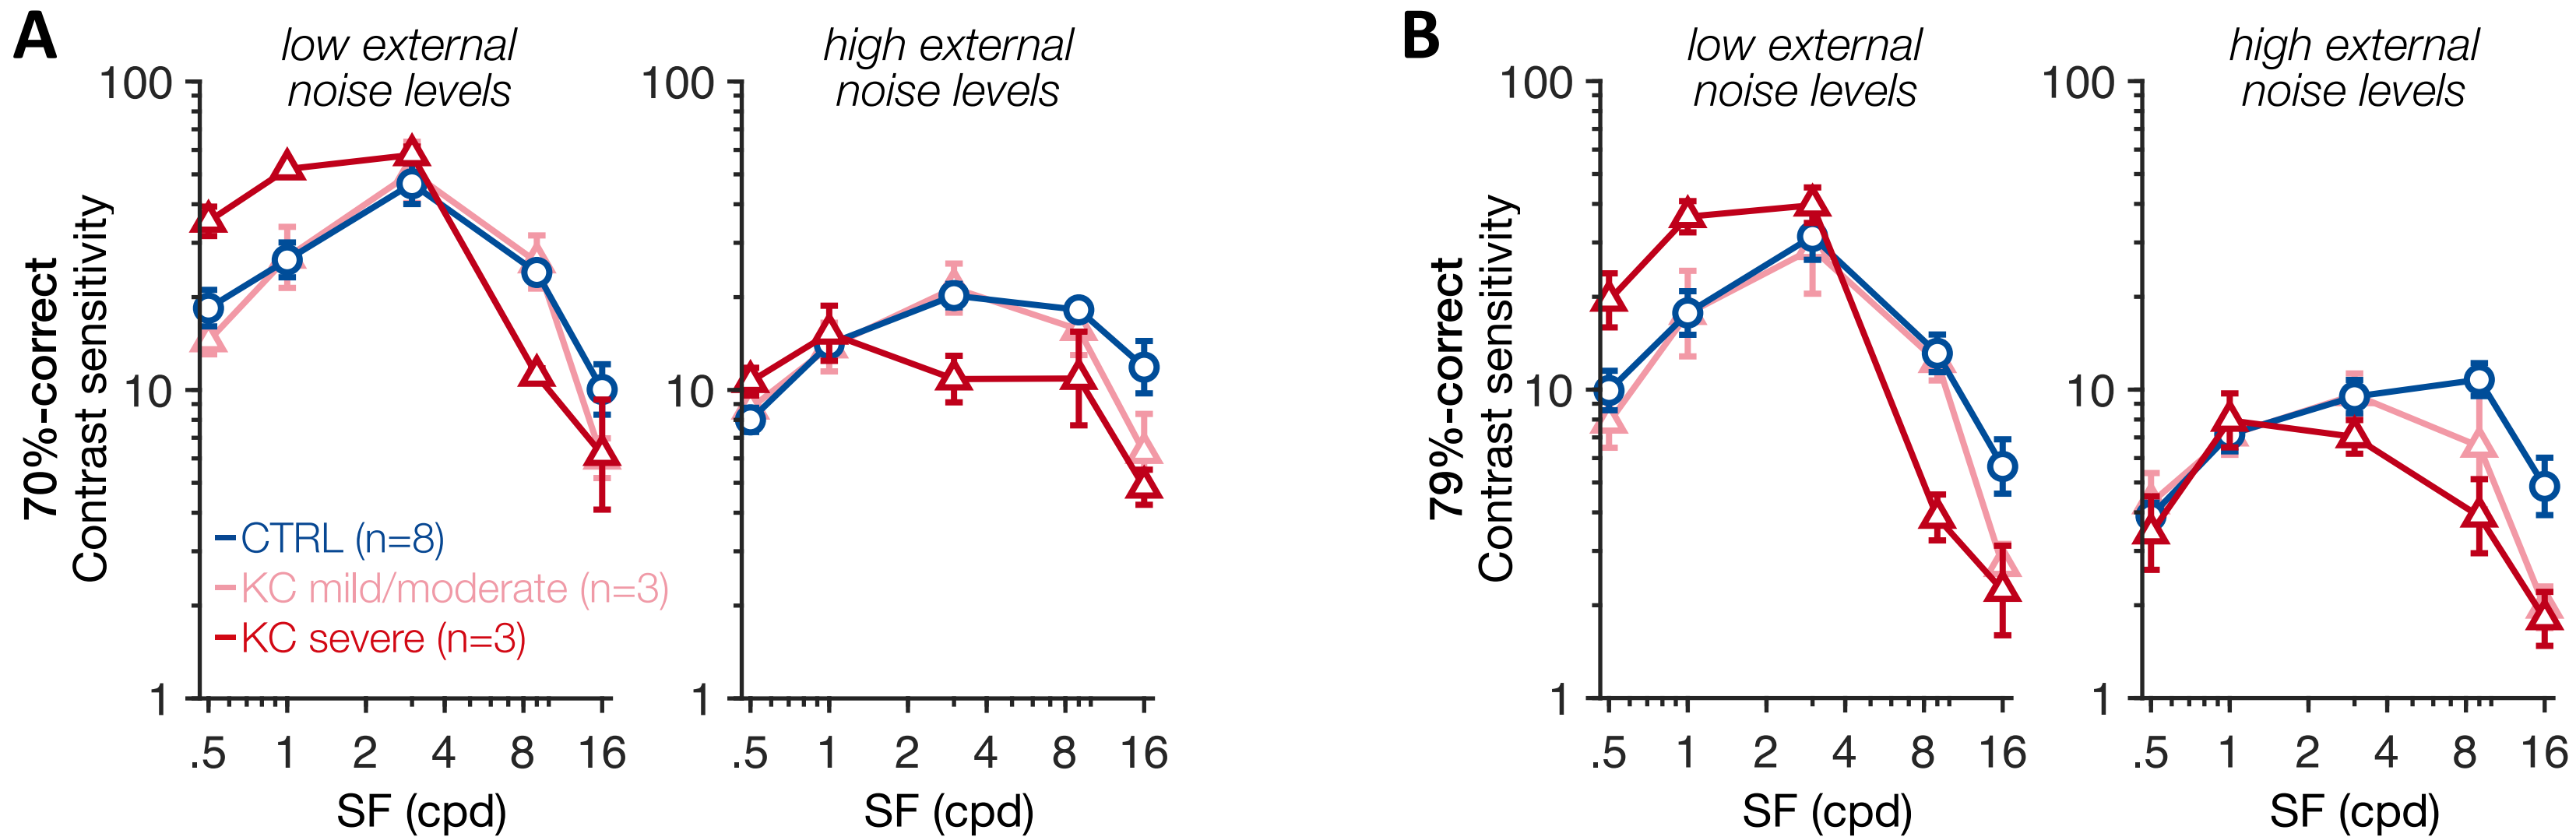

Supplement: supp [file elife_poa_e58734_Figure_7_figure_supplement_7.pdf › elife_poa_e58734_Figure_7_figure_supplement_7.pdf]
